# Supplementary material
Source: PubMed Central journal article supplement (PMC8882481)
Supplement: mmc1.pdf [file mmc1.pdf]

```

1
2 *=====
3 *CREATING VARIABLES
4
5 use NIDS-CRAM_1_2_3_4_5.dta, clear
6
7 **Dependent variable: depressive symptomology
8 gen ds_W2_1 = w2_nc_mnthlth_1 if w2_nc_mnthlth_1>0
9 replace ds_W2_1 = ds_W2_1-1
10 gen ds_W2_2 = w2_nc_mnthlth_2 if w2_nc_mnthlth_2>0
11 replace ds_W2_2 = ds_W2_2-1
12 gen ds_W3_1 = w3_nc_mnthlth_1 if w3_nc_mnthlth_1>0
13 replace ds_W3_1 = ds_W3_1-1
14 gen ds_W3_2 = w3_nc_mnthlth_2 if w3_nc_mnthlth_2>0
15 replace ds_W3_2 = ds_W3_2-1
16 gen ds_W5_1 = w5_nc_mnthlth_1 if w5_nc_mnthlth_1>0
17 replace ds_W5_1 = ds_W5_1-1
18 gen ds_W5_2 = w5_nc_mnthlth_2 if w5_nc_mnthlth_2>0
19 replace ds_W5_2 = ds_W5_2-1
20 gen ds_W2 = ds_W2_1+ds_W2_2
21 gen ds_W3 = ds_W3_1+ds_W3_2
22 gen ds_W5 = ds_W5_1+ds_W5_2
23
24 **Primary covariate of interest: Food insecurity
25 gen hh_nfoodW1 = w1_nc_hhfdyn
26 replace hh_nfoodW1 = 0 if w1_nc_hhfdyn == 2
27 replace hh_nfoodW1 = . if w1_nc_hhfdyn == -8 | w1_nc_hhfdyn == -9
28
29 gen hh_nfoodW2 = w2_nc_hhfdyn
30 replace hh_nfoodW2 = 0 if w2_nc_hhfdyn == 2
31 replace hh_nfoodW2 = . if w2_nc_hhfdyn == -8 | w2_nc_hhfdyn == -9
32
33 gen hh_nfoodW3 = w3_nc_hhfdyn
34 replace hh_nfoodW3 = 0 if w3_nc_hhfdyn == 2
35 replace hh_nfoodW3 = . if w3_nc_hhfdyn == -8 | w3_nc_hhfdyn == -9
36
37 gen hh_nfoodW4 = w4_nc_hhfdyn
38 replace hh_nfoodW4 = 0 if w4_nc_hhfdyn == 2
39 replace hh_nfoodW4 = . if w4_nc_hhfdyn == -8 | w4_nc_hhfdyn == -9
40
41 gen hh_nfoodW5 = w5_nc_hhfdyn
42 replace hh_nfoodW5 = 0 if w5_nc_hhfdyn == 2
43 replace hh_nfoodW5 = . if w5_nc_hhfdyn == -8 | w5_nc_hhfdyn == -9
44
45 gen hh_hhungerW1 = w1_nc_fdayn
46 replace hh_hhungerW1 = 0 if w1_nc_fdayn == 2
47 replace hh_hhungerW1 = . if w1_nc_fdayn == -8 | w1_nc_fdayn == -9

```

```

48
49 gen hh_hhungerW2 = w2_nc_fdayn
50 replace hh_hhungerW2 = 0 if w2_nc_fdayn == 2
51 replace hh_hhungerW2 = . if w2_nc_fdayn == -8 | w2_nc_fdayn == -9
52
53 gen hh_hhungerW3 = w3_nc_fdayn
54 replace hh_hhungerW3 = 0 if w3_nc_fdayn == 2
55 replace hh_hhungerW3 = . if w3_nc_fdayn == -8 | w3_nc_fdayn == -9
56
57 gen hh_hhungerW4 = w4_nc_fdayn
58 replace hh_hhungerW4 = 0 if w4_nc_fdayn == 2
59 replace hh_hhungerW4 = . if w4_nc_fdayn == -8 | w4_nc_fdayn == -9
60
61 gen hh_hhungerW5 = w5_nc_fdayn
62 replace hh_hhungerW5 = 0 if w5_nc_fdayn == 2
63 replace hh_hhungerW5 = . if w5_nc_fdayn == -8 | w5_nc_fdayn == -9
64
65 gen hh_hngeverdayW1 = .
66 replace hh_hngeverdayW1 = 1 if w1_nc_fdaskp == 4 | w1_nc_fdaskp == 5
67 replace hh_hngeverdayW1 = 0 if w1_nc_fdaskp > 0 & w1_nc_fdaskp < 4
68
69 gen hh_hngeverdayW2 = .
70 replace hh_hngeverdayW2 = 1 if w2_nc_fdaskp == 4 | w2_nc_fdaskp == 5
71 replace hh_hngeverdayW2 = 0 if w2_nc_fdaskp > 0 & w2_nc_fdaskp < 4
72
73 gen hh_hngeverdayW3 = .
74 replace hh_hngeverdayW3 = 1 if w3_nc_fdaskp == 4 | w3_nc_fdaskp == 5
75 replace hh_hngeverdayW3 = 0 if w3_nc_fdaskp > 0 & w3_nc_fdaskp < 4
76
77 gen hh_hngeverdayW4 = .
78 replace hh_hngeverdayW4 = 1 if w4_nc_fdaskp == 4 | w4_nc_fdaskp == 5
79 replace hh_hngeverdayW4 = 0 if w4_nc_fdaskp > 0 & w4_nc_fdaskp < 4
80
81 gen hh_hngeverdayW5 = .
82 replace hh_hngeverdayW5 = 1 if w5_nc_fdaskp == 4 | w5_nc_fdaskp == 5
83 replace hh_hngeverdayW5 = 0 if w5_nc_fdaskp > 0 & w5_nc_fdaskp < 4
84
85 forvalues i = 1(1)5 {
86     gen food_securityW`i' = cond(hh_nfoodW`i' == 0, 1, 0) if
hh_nfoodW`i' != .
87     replace food_securityW`i' = 2 if hh_nfoodW`i' == 1 &
hh_hhungerW`i' == 0
88     replace food_securityW`i' = 3 if hh_nfoodW`i' == 1 &
hh_hhungerW`i' == 1 & w`i'_nc_fdaskp <= 2
89     replace food_securityW`i' = 4 if hh_nfoodW`i' == 1 &
hh_hhungerW`i' == 1 & w`i'_nc_fdaskp > 2 & w`i'_nc_fdaskp != .
90     replace food_securityW`i' = . if food_securityW`i' == 0
91 }

```

```

92
93 label define secure 1 "food secure" 2 "mildly food insecure" 3
"moderately food insecure" 4 "food insecure", replace
94 label values food_securityW1 food_securityW2 food_securityW3
food_securityW4 food_securityW5 secure
95
96 forvalues i = 1(1)5 {
97     gen food_secureW`i' = cond(food_securityW`i' == 3|
food_securityW`i' == 4,1, 0) if food_securityW`i'!=.
98     tab food_secureW`i', gen(foodsecureW`i')
99     tab food_securityW`i', gen(foodsecurityW`i')
100 }
101
102 replace food_secureW2 = 1 if w2_nc_fdayn == 1 & food_secureW2 == 0
103 replace food_secureW3 = 1 if w3_nc_fdayn == 1 & food_secureW3 == 0
104 replace food_secureW5 = 1 if w5_nc_fdayn == 1 & food_secureW5 == 0
105
106 **Respondent demographics
107
108 //Gender
109 gen female=w5_nc_best_gen==2 if w5_nc_best_gen~=.
110 replace female=w4_nc_best_gen==2 if w4_nc_best_gen~=. & female==.
111 replace female=w3_nc_best_gen==2 if w3_nc_best_gen~=. & female==.
112 replace female=w2_nc_best_gen==2 if w2_nc_best_gen~=. & female==.
113 replace female=w1_nc_best_gen==2 if w1_nc_best_gen~=. & female==.
114
115 //Racial classification
116 gen race=w5_nc_best_race
117 replace race=w4_nc_best_race if race == . & w4_nc_best_race!=.
118 replace race=w3_nc_best_race if race == . & w3_nc_best_race!=.
119 replace race=w2_nc_best_race if race == . & w2_nc_best_race!=.
120 replace race=w1_nc_best_race if race == . & w1_nc_best_race!=.
121
122 tab race, gen(race)
123 ren race1 african
124 ren race2 coloured
125 ren race3 indian
126 ren race4 white
127
128 //Age (in years)
129 gen age = w5_nc_best_age_yrs
130 replace age = w4_nc_best_age_yrs if age==. & w4_nc_best_age_yrs!=.
131 replace age = w3_nc_best_age_yrs if age==. & w3_nc_best_age_yrs!=.
132 replace age = w2_nc_best_age_yrs if age==. & w2_nc_best_age_yrs!=.
133 replace age = w1_nc_best_age_yrs if age==. & w1_nc_best_age_yrs!=.
134
135 //Marital status
136 gen marriedW2 = cond(w2_nc_mar == 1, 1, 0) if w2_nc_mar>0 &

```

```

w2_nc_mar!=.
137 gen marriedW3 = cond(w3_nc_mar == 1, 1, 0) if w3_nc_mar>0 &
w3_nc_mar!=.
138 gen marriedW4 = cond(w4_nc_mar == 1, 1, 0) if w4_nc_mar>0 &
w4_nc_mar!=.
139 gen marriedW5 = cond(w5_nc_mar == 1, 1, 0) if w5_nc_mar>0 &
w5_nc_mar!=.
140
141 //Level of education
142 gen educ = w5_nc_edschgrd
143 replace educ = w4_nc_edschgrd if educ ==-9 | educ ==-8 | educ ==-3 |
educ == .
144 replace educ = w3_nc_edschgrd if educ ==-9 | educ ==-8 | educ ==-3 |
educ == .
145 replace educ = w2_nc_edschgrd if educ ==-9 | educ ==-8 | educ ==-3 |
educ == .
146 replace educ = w1_nc_edschgrd if educ ==-9 | educ ==-8 | educ ==-3 |
educ == .
147 replace educ = . if educ ==-9 | educ ==-8 | educ ==-3
148
149 gen educcat=0
150 replace educcat=. if educ ==.
151 replace educcat=0 if educ==0 | educ==19
152 replace educcat = 1 if educ>=1 & educ<=7
153 replace educcat = 2 if (educ>=8 & educ<=11) | educ==13 | educ==14 |
educ==16 | educ==17
154 replace educcat = 3 if educ==12 | educ==15 | educ==18
155 replace educcat = 4 if educcat == 3 & w1_nc_edter==1 //Note
that post-matric/tertiary here requires that individuals passed
matric too
156 replace educcat = 4 if educcat == 3 & w2_nc_edter==1
157 replace educcat = 4 if educcat == 3 & w3_nc_edter==1
158 replace educcat = 4 if educcat == 3 & w4_nc_edter==1
159 replace educcat = 4 if educcat == 3 & w5_nc_edter==1
160
161 label define educcat 0 "No schooling" 1 "Gr1-7" 2 "Gr8-11" 3
"Matric" 4 "Post-matric"
162 label values educcat educcat
163
164 // Education: collapse no schooling into the same category as
primary schooling
165 gen educcat2 = educcat
166 replace educcat2 = 1 if educcat2 == 0
167
168 tab educcat2, gen(educ)
169
170 //Employment status
171 gen employFeb =0

```

```

173 replace employFeb =. if w1_nc_em_feb ==-9 | w1_nc_em_feb==-8
174 replace employFeb =1 if w1_nc_eman_feb ==1
175 replace employFeb =1 if w1_nc_ems_feb ==1
176 replace employFeb =1 if w1_nc_ems_feb ==2
177 replace employFeb =0 if w1_nc_eman_feb == 2 & w1_nc_ems_feb ==3
178
179 gen employApr = cond(w1_nc_empl_stat == 3, 1, 0)
180 replace employApr = . if w1_nc_empl_stat <0
181 replace employApr = . if w1_nc_empl_stat ==.
182 replace w2_nc_empl_stat=0 if w2_nc_em_june==3
183 gen employJune = cond(w2_nc_empl_stat == 3, 1, 0)
184 replace employJune = . if w2_nc_empl_stat < 0
185 replace employJune = . if w2_nc_empl_stat ==.
186 gen employOct = cond(w3_nc_empl_stat == 3, 1, 0)
187 replace employOct = . if w3_nc_empl_stat < 0
188 replace employOct = . if w3_nc_empl_stat ==.
189 gen employJan = cond(w4_nc_empl_stat == 3, 1, 0)
190 replace employJan = . if w4_nc_empl_stat < 0
191 replace employJan = . if w4_nc_empl_stat ==.
192 gen employMar = cond(w5_nc_empl_stat == 3, 1, 0)
193 replace employMar = . if w5_nc_empl_stat < 0
194 replace employMar = . if w5_nc_empl_stat ==.
195
196 //Perceptions of risk around Covid-19
197 gen atriskW2 = w2_nc_cvrsk if w2_nc_cvrsk>0
198 replace atriskW2 = 3 if w2_nc_cvrsk == -9
199 gen atriskW3 = w3_nc_cvrsk if w3_nc_cvrsk>0
200 replace atriskW3 = 3 if w3_nc_cvrsk == -9
201 gen atriskW4 = w4_nc_cvrsk if w4_nc_cvrsk>0
202 replace atriskW4 = 3 if w4_nc_cvrsk == -9
203 gen atriskW5 = w5_nc_cvrsk if w5_nc_cvrsk>0
204 replace atriskW5 = 3 if w5_nc_cvrsk == -9
205
206 tab atriskW2, gen(atriskW2)
207 tab atriskW3, gen(atriskW3)
208 tab atriskW5, gen(atriskW5)
209
210 ** Household demographics
211 //Number of individuals and children living in household
212 forvalues i = 1(1)5 {
213     gen hhsizew`i' = w`i'_nc_nopres
214     replace hhsizew`i'=. if w`i'_nc_nopres==-8 | w`i'_nc_nopres==-9
215     replace hhsizew`i'=1 if w`i'_nc_nopres==0
216 }
217
218 gen nkids17W1 = w1_nc_nou18res
219 replace nkids17W1 = . if w1_nc_nou18res == -9 | w1_nc_nou18res == -
8 | w1_nc_nou18res == -3

```

```

220 replace nkids17W1 = 0 if nkids17W1 == . & hhsizew1 == 1
221 replace nkids17W1 = 0 if nkids17W1 == . & w1_nc_nocld == 4
222
223 gen kids17W1 = 0
224 replace kids17W1 = 1 if nkids17W1 ~= 0
225 replace kids17W1 = . if nkids17W1 == .
226
227 gen nkids6W1 = w1_nc_nou7res
228 replace nkids6W1 = . if w1_nc_nou7res== -9 | w1_nc_nou7res== -8 |
w1_nc_nou7res== -3
229 replace nkids6W1 = 0 if w1_nc_nou18res==0
230 replace nkids6W1 = 0 if nkids6W1==. & hhsizew1==1
231 replace nkids6W1 = 0 if nkids6W1==. & w1_nc_nocld==4
232
233 gen kids6W1 = 0
234 replace kids6W1 = 1 if nkids6W1 ~= 0
235 replace kids6W1 = . if nkids6W1 == .
236
237 gen nkids17W2 = w2_nc_nou18res
238 replace nkids17W2=. if w2_nc_nou18res== -9 | w2_nc_nou18res== -8 |
w2_nc_nou18res== -3
239 replace nkids17W2=0 if nkids17W2==. & hhsizew2==1
240 replace nkids17W2=0 if nkids17W2==. & w2_nc_nocld==0
241
242 gen kids17W2 = 0
243 replace kids17W2=1 if nkids17W2~=0
244 replace kids17W2=. if nkids17W2==.
245
246 gen nkids6W2 = w2_nc_nou7res
247 replace nkids6W2 = . if w2_nc_nou7res== -9 | w2_nc_nou7res== -8 |
w2_nc_nou7res== -3
248 replace nkids6W2 = 0 if w2_nc_nou18res==0
249 replace nkids6W2 = 0 if nkids6W2==. & hhsizew2==1
250 replace nkids6W2 = 0 if nkids6W2==. & w2_nc_nocld==0
251
252 gen kids6W2 = 0
253 replace kids6W2 = 1 if nkids6W2 ~= 0
254 replace kids6W2 = . if nkids6W2 == .
255
256 egen nkids17W3 = rowtotal(w3_nc_nou7res w3_nc_no7to17res) if
w3_nc_nou7res!= -9 & w3_nc_nou7res!= -8 & w3_nc_nou7res!= -3 &
w3_nc_no7to17res!= -9 & w3_nc_no7to17res!= -8 & w3_nc_no7to17res!= -3
257 replace nkids17W3 = . if w3_nc_nou7res == . & w3_nc_no7to17res == .
258 replace nkids17W3=0 if nkids17W3==. & hhsizew3==1
259
260 gen kids17W3 = 0
261 replace kids17W3=1 if nkids17W3~=0
262 replace kids17W3=. if nkids17W3==.

```

```
263
264 gen nkids6W3 = w3_nc_nou7res
265 replace nkids6W3 = . if w3_nc_nou7res== -9 | w3_nc_nou7res== -8 |
    w3_nc_nou7res== -3
266 replace nkids6W3 = 0 if nkids6W3==. & hhsizew3==1
267 replace nkids6W3 = 0 if nkids6W3==. & w3_nc_nocld==0
268
269 gen kids6W3 = 0
270 replace kids6W3 = 1 if nkids6W3 ~ = 0
271 replace kids6W3 = . if nkids6W3 == .
272
273 egen nkids17W4 = rowtotal(w4_nc_nou7res w4_nc_no7to17res) if
    w4_nc_nou7res!= -9 & w4_nc_nou7res!= -8 & w4_nc_nou7res!= -4 &
    w4_nc_no7to17res!= -9 & w4_nc_no7to17res!= -8 & w4_nc_no7to17res!= -3
274 replace nkids17W4 = . if w4_nc_nou7res == . & w4_nc_no7to17res == .
275 replace nkids17W4=0 if nkids17W4==. & hhsizew4==1
276
277 gen kids17W4 = 0
278 replace kids17W4=1 if nkids17W4~ =0
279 replace kids17W4=. if nkids17W4==.
280
281 gen nkids6W4 = w4_nc_nou7res
282 replace nkids6W4 = . if w4_nc_nou7res== -9 | w4_nc_nou7res== -8 |
    w4_nc_nou7res== -3
283 replace nkids6W4 = 0 if nkids6W4==. & hhsizew4==1
284 replace nkids6W4 = 0 if nkids6W4==. & w4_nc_nocld==0
285
286 gen kids6W4 = 0
287 replace kids6W4 = 1 if nkids6W4 ~ = 0
288 replace kids6W4 = . if nkids6W4 == .
289
290 egen nkids17W5 = rowtotal(w5_nc_nou7res w5_nc_no7to17res) if
    w5_nc_nou7res!= -9 & w5_nc_nou7res!= -8 & w5_nc_nou7res!= -3 &
    w5_nc_no7to17res!= -9 & w5_nc_no7to17res!= -8 & w5_nc_no7to17res!= -3
291 replace nkids17W5 = . if w5_nc_nou7res == . & w5_nc_no7to17res == .
292 replace nkids17W5=0 if nkids17W5==. & hhsizew5==1
293
294 gen nkids6W5 = w5_nc_nou7res
295 replace nkids6W5 = . if w5_nc_nou7res== -9 | w5_nc_nou7res== -8 |
    w5_nc_nou7res== -3
296 replace nkids6W5 = 0 if nkids6W5==. & hhsizew5==1
297 replace nkids6W5 = 0 if nkids6W5==. & w5_nc_nocld==0
298
299 gen kids17W5 = 0
300 replace kids17W5=1 if nkids17W5~ =0
301 replace kids17W5=. if nkids17W5==.
302
303 gen nkids7to17W2 = nkids17W2 - nkids6W2
```

```
304 gen nkids7to17W3 = nkids17W3 - nkids6W3
305 gen nkids7to17W4 = nkids17W4 - nkids6W4
306 gen nkids7to17W5 = nkids17W5 - nkids6W5
307
308 //Childcare responsibilities
309 gen childcare_W2 = w2_nc_chldcar_lev3 if w2_nc_chldcar_lev3>=0
310 gen childcare_W3 = w3_nc_chldcar_oct if w3_nc_chldcar_oct>=0
311 gen childcare_W5 = w5_nc_chldcar_mar if w5_nc_chldcar_mar>=0
312
313 //cap at a maximum of 16 hours per day
314 gen childcare_capW2 = childcare_W2
315 replace childcare_capW2 = 16 if childcare_capW2>16 &
  childcare_capW2!=.
316 replace childcare_capW2 = 0 if childcare_capW2 == . & kids17W2 == 0
317 gen childcare_capW3 = childcare_W3
318 replace childcare_capW3 = 16 if childcare_capW3>16 &
  childcare_capW3!=.
319 replace childcare_capW3 = 0 if childcare_capW3 == . & kids17W3 == 0
320 gen childcare_capW5 = childcare_W5
321 replace childcare_capW5 = 16 if childcare_capW5>16 &
  childcare_capW5!=.
322 replace childcare_capW5 = 0 if childcare_capW5 == . & kids17W5 == 0
323
324 //Cohabitation with partner/spouse
325 gen live_spouseW2 = cond(w2_nc_lvetog == 1, 1, 0) if w2_nc_lvetog>=
  1 & w2_nc_lvetog!=.
326 replace live_spouseW2 = 0 if live_spouseW2 ==. & w2_nc_mar!=.
327 gen live_spouseW3 = cond(w3_nc_lvetog == 1, 1, 0) if w3_nc_lvetog>=
  1 & w3_nc_lvetog!=.
328 replace live_spouseW3 = 0 if live_spouseW3 ==. & w3_nc_mar!=.
329 gen live_spouseW5 = cond(w5_nc_lvetog == 1, 1, 0) if w5_nc_lvetog>=
  1 & w5_nc_lvetog!=.
330 replace live_spouseW5 = 0 if live_spouseW5 ==. & w5_nc_mar!=.
331
332 //Cohabitation status over all waves
333 gen continuous_cohabitate = cond(w3_nc_lvetog == 1 & w4_nc_lvetog
  == 1 & w5_nc_lvetog == 1, 1, 0)
334 replace continuous_cohabitate = . if marriedW3 == . & marriedW4 ==
  . & marriedW5 == .
335
336 gen sometimes_cohabitate = cond(w3_nc_lvetog == 1 | w4_nc_lvetog ==
  1 | w5_nc_lvetog == 1, 1, 0)
337 replace sometimes_cohabitate = . if marriedW3 == . & marriedW4 == .
  & marriedW5 == .
338
339 gen never_married = cond(marriedW3 == 0 & marriedW4 == 0 &
  marriedW5 == 0, 1, 0)
340 replace never_married = . if marriedW3 == . & marriedW4 == . &
```



```

    marriedW5 == .
341
342 //Have biological/adopted children
343 gen have_kids = cond(w3_nc_chldn == 0, 0, 1) if w3_nc_chldn>=0 &
    w3_nc_chldn!=.
344
345 //Live with children in all waves
346 gen keep = cond(kids17W2 ==1 & kids17W3 == 1 & kids17W5 == 1, 1, 0)
347
348 **Household socioeconomic status
349 //Income source in household
350 gen grant_mainincomeW1 = cond(w1_nc_hhincsrc1 == 3, 1, 0) if
    w1_nc_hhincsrc1>0
351 gen grant_mainincomeW2 = cond(w2_nc_hhincmain == 3, 1, 0) if
    w2_nc_hhincmain>0
352 gen grant_mainincomeW3 = cond(w3_nc_hhincmain == 3, 1, 0) if
    w3_nc_hhincmain>0
353 gen grant_mainincomeW4 = cond(w4_nc_hhincmain == 3, 1, 0) if
    w4_nc_hhincmain>0
354 gen grant_mainincomeW5 = cond(w5_nc_hhincmain == 3, 1, 0) if
    w5_nc_hhincmain>0
355
356 gen empl_mainincomeW1 = cond(w1_nc_hhincsrc1 == 1|w1_nc_hhincsrc1
    == 2, 1, 0) if w1_nc_hhincsrc1>0
357 gen empl_mainincomeW2 = cond(w2_nc_hhincmain == 1|w2_nc_hhincmain
    == 2, 1, 0) if w2_nc_hhincmain>0
358 gen empl_mainincomeW3 = cond(w3_nc_hhincmain == 1|w3_nc_hhincmain
    == 2, 1, 0) if w3_nc_hhincmain>0
359 gen empl_mainincomeW4 = cond(w4_nc_hhincmain == 1|w4_nc_hhincmain
    == 2, 1, 0) if w4_nc_hhincmain>0
360 gen empl_mainincomeW5 = cond(w5_nc_hhincmain == 1|w5_nc_hhincmain
    == 2, 1, 0) if w5_nc_hhincmain>0
361
362 **Access to social assistance
363 //School meals received by children
364 gen schoolmealW2 = cond(w2_nc_schfood == 1, 1, 0) if w2_nc_schfood>
    0 & w2_nc_schfood!=.
365 gen schoolmealW3 = cond(w3_nc_schfood == 1, 1, 0) if w3_nc_schfood>
    0 & w3_nc_schfood<3
366 gen schoolmealW4 = cond(w4_nc_schfood == 1, 1, 0) if w4_nc_schfood>
    0 & w4_nc_schfood<3
367 gen schoolmealW5 = cond(w5_nc_schfood2w == 1, 1, 0) if
    w5_nc_schfood2w>0 & w5_nc_schfood2w<3
368
369 //Support with food/shelter from NGO/church/similar and
    community/neighbourhood
370
371 forvalues i = 3(1)5 {

```

```
372     gen support_ngo_W`i' = cond(w`i'_nc_suppngo == 1, 1, 0) if w`i'  
_nc_suppngo>0 & w`i'_nc_suppngo!=.  
373     gen support_com_W`i' = cond(w`i'_nc_suppcom == 1, 1, 0) if w`i'  
_nc_suppcom>0 & w`i'_nc_suppcom!=.  
374 }  
375  
376 //proxy support from NGO and community in W2 with information from  
W1  
377 gen support_ngo_W2 = cond(w1_nc_suppngo == 1, 1, 0) if  
w1_nc_suppngo>0 & w1_nc_suppngo!=.  
378 gen support_com_W2 = cond(w1_nc_suppcom == 1, 1, 0) if  
w1_nc_suppcom>0 & w1_nc_suppcom!=.  
379  
380
```
