# Supplementary material
Source: PubMed Central journal article supplement (PMC8882481)
Supplement: mmc6.pdf [file mmc6.pdf]

```

1 *****
2 *****DESCRIPTIVE STATISTICS*****
3 *****
4
5 //Final sample used
6 sem (ds_W3 <- nkids6W3@b2 nkids7to17W3@b3 childcare_capW3@b4
live_spouseW3@b5 /*
7     */ employ0ct@b6 empl_mainincomeW3@b7 grant_mainincomeW3@b8 /*
8     */ foodsecurityW32@b9 food_secureW3@b10 /*
9     */ atriskW31@b12 atriskW33@b13 support_ngo_W3@b14
support_com_W3@b15 /*
10    */ african@b16 coloured@b17 educ1@b18 educ3@b19 educ4@b20) /*
11    */ (ds_W5 <- nkids6W5@b2 nkids7to17W5@b3 childcare_capW5@b4
live_spouseW5@b5 /*
12    */ employMar@b6 empl_mainincomeW5@b7 grant_mainincomeW5@b8 /*
13    */ foodsecurityW52@b9 food_secureW5@b10 /*
14    */ atriskW51@b12 atriskW53@b13 support_ngo_W5@b14
support_com_W5@b15 /*
15    */ african@b16 coloured@b17 educ1@b18 educ3@b19 educ4@b20) /*
16    */ [pw=w5_nc_bp_pweight_s], /*
17    */ iterate(250) technique(nr 25 bhhh 25) noxconditional method(
mlmv)
18
19 gen sample = e(sample)
20
21 //Table 1
22 tabstat ds_W2 if sample == 1 [aw=w5_nc_bp_pweight_s], by(female)
stat(mean sd) save
23 matrix descriptives = [r(StatTotal)' , r(Stat2)' , r(Stat1)']
24 tabstat foodsecurityW21 if sample == 1 [aw=w5_nc_bp_pweight_s], by(
female) stat(mean sd) save
25 matrix descriptives = [descriptives \ r(StatTotal)' , r(Stat2)' , r
(Stat1)']
26 tabstat foodsecurityW22 if sample == 1 [aw=w5_nc_bp_pweight_s], by(
female) stat(mean sd) save
27 matrix descriptives = [descriptives \ r(StatTotal)' , r(Stat2)' , r
(Stat1)']
28 tabstat food_secureW2 if sample == 1 [aw=w5_nc_bp_pweight_s], by(
female) stat(mean sd) save
29 matrix descriptives = [descriptives \ r(StatTotal)' , r(Stat2)' , r
(Stat1)']
30 tabstat live_spouseW2 if sample == 1 [aw=w5_nc_bp_pweight_s], by(
female) stat(mean sd) save
31 matrix descriptives = [descriptives \ r(StatTotal)' , r(Stat2)' , r
(Stat1)']
32 tabstat nkids6W2 if sample == 1 [aw=w5_nc_bp_pweight_s], by(female)
stat(mean sd) save
33 matrix descriptives = [descriptives \ r(StatTotal)' , r(Stat2)' , r

```

```
(Stat1)']
34 tabstat nkids7to17W2 if sample == 1 [aw=w5_nc_bp_pweight_s], by(
female) stat(mean sd) save
35 matrix descriptives = [descriptives \ r(StatTotal)' , r(Stat2)' , r
(Stat1)']
36 tabstat childcare_capW2 if sample == 1 [aw=w5_nc_bp_pweight_s], by(
female) stat(mean sd) save
37 matrix descriptives = [descriptives \ r(StatTotal)' , r(Stat2)' , r
(Stat1)']
38 tabstat employJun if sample == 1 [aw=w5_nc_bp_pweight_s], by(female
) stat(mean sd) save
39 matrix descriptives = [descriptives \ r(StatTotal)' , r(Stat2)' , r
(Stat1)']
40 tabstat empl_mainincomew2 if sample == 1 [aw=w5_nc_bp_pweight_s],
by(female) stat(mean sd) save
41 matrix descriptives = [descriptives \ r(StatTotal)' , r(Stat2)' , r
(Stat1)']
42 tabstat grant_mainincomew2 if sample == 1 [aw=w5_nc_bp_pweight_s],
by(female) stat(mean sd) save
43 matrix descriptives = [descriptives \ r(StatTotal)' , r(Stat2)' , r
(Stat1)']
44 tabstat support_ngo_W2 if sample == 1 [aw=w5_nc_bp_pweight_s], by(
female) stat(mean sd) save
45 matrix descriptives = [descriptives \ r(StatTotal)' , r(Stat2)' , r
(Stat1)']
46 tabstat support_com_W2 if sample == 1 [aw=w5_nc_bp_pweight_s], by(
female) stat(mean sd) save
47 matrix descriptives = [descriptives \ r(StatTotal)' , r(Stat2)' , r
(Stat1)']
48 tabstat african if sample == 1 [aw=w5_nc_bp_pweight_s], by(female)
stat(mean sd) save
49 matrix descriptives = [descriptives \ r(StatTotal)' , r(Stat2)' , r
(Stat1)']
50 tabstat coloured if sample == 1 [aw=w5_nc_bp_pweight_s], by(female)
stat(mean sd) save
51 matrix descriptives = [descriptives \ r(StatTotal)' , r(Stat2)' , r
(Stat1)']
52 tabstat indian if sample == 1 [aw=w5_nc_bp_pweight_s], by(female)
stat(mean sd) save
53 matrix descriptives = [descriptives \ r(StatTotal)' , r(Stat2)' , r
(Stat1)']
54 tabstat white if sample == 1 [aw=w5_nc_bp_pweight_s], by(female)
stat(mean sd) save
55 matrix descriptives = [descriptives \ r(StatTotal)' , r(Stat2)' , r
(Stat1)']
56 tabstat educ1 if sample == 1 [aw=w5_nc_bp_pweight_s], by(female)
stat(mean sd) save
57 matrix descriptives = [descriptives \ r(StatTotal)' , r(Stat2)' , r
```

```
(Stat1)']
58 tabstat educ2 if sample == 1 [aw=w5_nc_bp_pweight_s], by(female)
   stat(mean sd) save
59 matrix descriptives = [descriptives \ r(StatTotal)' , r(Stat2)' , r
   (Stat1)']
60 tabstat educ3 if sample == 1 [aw=w5_nc_bp_pweight_s], by(female)
   stat(mean sd) save
61 matrix descriptives = [descriptives \ r(StatTotal)' , r(Stat2)' , r
   (Stat1)']
62 tabstat educ4 if sample == 1 [aw=w5_nc_bp_pweight_s], by(female)
   stat(mean sd) save
63 matrix descriptives = [descriptives \ r(StatTotal)' , r(Stat2)' , r
   (Stat1)']
64 tabstat atriskW21 if sample == 1 [aw=w5_nc_bp_pweight_s], by(female
   ) stat(mean sd) save
65 matrix descriptives = [descriptives \ r(StatTotal)' , r(Stat2)' , r
   (Stat1)']
66 tabstat atriskW22 if sample == 1 [aw=w5_nc_bp_pweight_s], by(female
   ) stat(mean sd) save
67 matrix descriptives = [descriptives \ r(StatTotal)' , r(Stat2)' , r
   (Stat1)']
68 tabstat atriskW23 if sample == 1 [aw=w5_nc_bp_pweight_s], by(female
   ) stat(mean sd) save
69 matrix descriptives = [descriptives \ r(StatTotal)' , r(Stat2)' , r
   (Stat1)']
70
71 quietly svyset cluster [weight = w5_nc_bp_pweight_s], strata(
   stratum) singleunit(scaled)
72
73 svy, subpop(if sample == 1): reg ds_W2 i.female
74 matrix table = r(table)
75 matrix pvalue = [table[4,2]]
76 svy, subpop(if sample == 1): reg foodsecurityW21 i.female
77 matrix table = r(table)
78 matrix pvalue = [pvalue \ table[4,2]]
79 svy, subpop(if sample == 1): reg foodsecurityW22 i.female
80 matrix table = r(table)
81 matrix pvalue = [pvalue \ table[4,2]]
82 svy, subpop(if sample == 1): reg food_secureW2 i.female
83 matrix table = r(table)
84 matrix pvalue = [pvalue \ table[4,2]]
85 svy, subpop(if sample == 1): reg live_spouseW2 i.female
86 matrix table = r(table)
87 matrix pvalue = [pvalue \ table[4,2]]
88 svy, subpop(if sample == 1): reg nkids6W2 i.female
89 matrix table = r(table)
90 matrix pvalue = [pvalue \ table[4,2]]
91 svy, subpop(if sample == 1): reg nkids7to17W2 i.female
```

```
92 matrix table = r(table)
93 matrix pvalue = [pvalue \ table[4,2]]
94 svy, subpop(if sample == 1): reg childcare_capW2 i.female
95 matrix table = r(table)
96 matrix pvalue = [pvalue \ table[4,2]]
97 svy, subpop(if sample == 1): reg employJun i.female
98 matrix table = r(table)
99 matrix pvalue = [pvalue \ table[4,2]]
100 svy, subpop(if sample == 1): reg empl_mainincomeW2 i.female
101 matrix table = r(table)
102 matrix pvalue = [pvalue \ table[4,2]]
103 svy, subpop(if sample == 1): reg grant_mainincomeW2 i.female
104 matrix table = r(table)
105 matrix pvalue = [pvalue \ table[4,2]]
106 svy, subpop(if sample == 1): reg support_ngo_W2 i.female
107 matrix table = r(table)
108 matrix pvalue = [pvalue \ table[4,2]]
109 svy, subpop(if sample == 1): reg support_com_W2 i.female
110 matrix table = r(table)
111 matrix pvalue = [pvalue \ table[4,2]]
112 svy, subpop(if sample == 1): reg african i.female
113 matrix table = r(table)
114 matrix pvalue = [pvalue \ table[4,2]]
115 svy, subpop(if sample == 1): reg coloured i.female
116 matrix table = r(table)
117 matrix pvalue = [pvalue \ table[4,2]]
118 svy, subpop(if sample == 1): reg indian i.female
119 matrix table = r(table)
120 matrix pvalue = [pvalue \ table[4,2]]
121 svy, subpop(if sample == 1): reg white i.female
122 matrix table = r(table)
123 matrix pvalue = [pvalue \ table[4,2]]
124 svy, subpop(if sample == 1): reg educ1 i.female
125 matrix table = r(table)
126 matrix pvalue = [pvalue \ table[4,2]]
127 svy, subpop(if sample == 1): reg educ2 i.female
128 matrix table = r(table)
129 matrix pvalue = [pvalue \ table[4,2]]
130 svy, subpop(if sample == 1): reg educ3 i.female
131 matrix table = r(table)
132 matrix pvalue = [pvalue \ table[4,2]]
133 svy, subpop(if sample == 1): reg educ4 i.female
134 matrix table = r(table)
135 matrix pvalue = [pvalue \ table[4,2]]
136 svy, subpop(if sample == 1): reg atriskW21 i.female
137 matrix table = r(table)
138 matrix pvalue = [pvalue \ table[4,2]]
139 svy, subpop(if sample == 1): reg atriskW22 i.female
```

```

140 matrix table = r(table)
141 matrix pvalue = [pvalue \ table[4,2]]
142 svy, subpop(if sample == 1): reg atriskW23 i.female
143 matrix table = r(table)
144 matrix pvalue = [pvalue \ table[4,2]]
145
146 matrix Table1 = [descriptives , pvalue]
147
148 matrix colnames Table1 = "Mean all" "SD all" "Mean women" "SD
women" "Mean men" "SD men" "pvalue diff"
149
150 matrix list Table1
151
152 *****
153 *****TRENDS OVER WAVES*****
154 *****
155
156 **Figure 2
157 mean foodsecurityW21 if sample == 1 & female == 0 [aw=
w5_nc_bp_pweight_s]
158 matrix table = r(table)
159 matrix food_secure_men = [table[1,1] , table[5,1] , table[6,1]]
160 mean foodsecurityW31 if sample == 1 & female == 0 [aw=
w5_nc_bp_pweight_s]
161 matrix table = r(table)
162 matrix food_secure_men = [food_secure_men \ table[1,1] , table[5,1]
, table[6,1]]
163 mean foodsecurityW51 if sample == 1 & female == 0 [aw=
w5_nc_bp_pweight_s]
164 matrix table = r(table)
165 matrix food_secure_men = [food_secure_men \ table[1,1] , table[5,1]
, table[6,1]]
166
167 matrix rownames food_secure_men = "Wave 2" "Wave 3" "Wave 5"
168
169 mean foodsecurityW21 if sample == 1 & female == 1 [aw=
w5_nc_bp_pweight_s]
170 matrix table = r(table)
171 matrix food_secure_women = [table[1,1] , table[5,1] , table[6,1]]
172 mean foodsecurityW31 if sample == 1 & female == 1 [aw=
w5_nc_bp_pweight_s]
173 matrix table = r(table)
174 matrix food_secure_women = [food_secure_women \ table[1,1] , table[
5,1] , table[6,1]]
175 mean foodsecurityW51 if sample == 1 & female == 1 [aw=
w5_nc_bp_pweight_s]
176 matrix table = r(table)
177 matrix food_secure_women = [food_secure_women \ table[1,1] , table[

```

```

5,1] , table[6,1]]
178
179 matrix rownames food_secure_women = "Wave 2" "Wave 3" "Wave 5"
180
181 coefplot (matrix(food_secure_women[,1]), ci((2 3)) /*
182   */label("Women")) /*
183   */(matrix(food_secure_men[,1]), ci((2 3)) /*
184   */label("Men")), ylabel(, angle(0) format(%12.2f) labszsize(small
)) xlabel(,labszsize(small)) /*
185   */ytitle("Percentage reporting to live in fully food secure
households", size(small)) /*
186   */legend(size(small)) /*
187   */ciopts(recast(rcap)) recast(connected) citop vertical
nooffset /*
188   */saving(food_secure.gph, replace)
189
190 mean ds_W2 if sample == 1 & female == 0 [aw=w5_nc_bp_pweight_s]
191 matrix table = r(table)
192 matrix depressymp_men = [table[1,1] , table[5,1] , table[6,1]]
193 mean ds_W3 if sample == 1 & female == 0 [aw=w5_nc_bp_pweight_s]
194 matrix table = r(table)
195 matrix depressymp_men = [depressymp_men \ table[1,1] , table[5,1] ,
table[6,1]]
196 mean ds_W5 if sample == 1 & female == 0 [aw=w5_nc_bp_pweight_s]
197 matrix table = r(table)
198 matrix depressymp_men = [depressymp_men \ table[1,1] , table[5,1] ,
table[6,1]]
199
200 matrix rownames depressymp_men = "Wave 2" "Wave 3" "Wave 5"
201
202 mean ds_W2 if sample == 1 & female == 1 [aw=w5_nc_bp_pweight_s]
203 matrix table = r(table)
204 matrix depressymp_women = [table[1,1] , table[5,1] , table[6,1]]
205 mean ds_W3 if sample == 1 & female == 1 [aw=w5_nc_bp_pweight_s]
206 matrix table = r(table)
207 matrix depressymp_women = [depressymp_women \ table[1,1] , table[5,
1] , table[6,1]]
208 mean ds_W5 if sample == 1 & female == 1 [aw=w5_nc_bp_pweight_s]
209 matrix table = r(table)
210 matrix depressymp_women = [depressymp_women \ table[1,1] , table[5,
1] , table[6,1]]
211
212 matrix rownames depressymp_women = "Wave 2" "Wave 3" "Wave 5"
213
214 coefplot (matrix(depressymp_women[,1]), ci((2 3)) /*
215   */label("Women")) /*
216   */(matrix(depressymp_men[,1]), ci((2 3)) /*
217   */label("Men")), ylabel(, angle(0) format(%12.2f) labszsize(small

```

```
)) xlabel(,labsize(small)) /*
218     */ytittle("Average self-reported depressive symptoms", size(
small)) /*
219     */legend(size(small)) /*
220     */ciopts(recast(rcap)) recast(connected) citop vertical
nooffset /*
221     */saving(depress_symp.gph, replace)
222
223 graph combine food_secure.gph depress_symp.gph, rows(1)
224
225 **Figure 3
226 mean ds_W2 if sample == 1 & female == 0 & foodsecurityW21 == 1 [aw=
w5_nc_bp_pweight_s]
227 matrix table = r(table)
228 matrix depressymp_FS_men = [table[1,1] , table[5,1] , table[6,1]]
229 mean ds_W3 if sample == 1 & female == 0 & foodsecurityW31 == 1 [aw
=w5_nc_bp_pweight_s]
230 matrix table = r(table)
231 matrix depressymp_FS_men = [depressymp_FS_men \ table[1,1] , table[
5,1] , table[6,1]]
232 mean ds_W5 if sample == 1 & female == 0 & foodsecurityW51 == 1 [aw
=w5_nc_bp_pweight_s]
233 matrix table = r(table)
234 matrix depressymp_FS_men = [depressymp_FS_men \ table[1,1] , table[
5,1] , table[6,1]]
235 mean ds_W2 if sample == 1 & female == 0 & foodsecurityW22 == 1 [aw=
w5_nc_bp_pweight_s]
236 matrix table = r(table)
237
238 matrix rownames depressymp_FS_men = "Wave 2" "Wave 3" "Wave 5"
239
240 matrix depressymp_mFS_men = [table[1,1] , table[5,1] , table[6,1]]
241 mean ds_W3 if sample == 1 & female == 0 & foodsecurityW32 == 1 [aw
=w5_nc_bp_pweight_s]
242 matrix table = r(table)
243 matrix depressymp_mFS_men = [depressymp_mFS_men \ table[1,1] ,
table[5,1] , table[6,1]]
244 mean ds_W5 if sample == 1 & female == 0 & foodsecurityW52 == 1 [aw
=w5_nc_bp_pweight_s]
245 matrix table = r(table)
246 matrix depressymp_mFS_men = [depressymp_mFS_men \ table[1,1] ,
table[5,1] , table[6,1]]
247 mean ds_W2 if sample == 1 & female == 0 & food_secureW2 == 1 [aw=
w5_nc_bp_pweight_s]
248 matrix table = r(table)
249
250 matrix rownames depressymp_mFS_men = "Wave 2" "Wave 3" "Wave 5"
251
```

```

252 matrix depressymp_FI_men = [table[1,1] , table[5,1] , table[6,1]]
253 mean ds_W3 if sample == 1 & female == 0 & food_secureW3 == 1 [aw=
w5_nc_bp_pweight_s]
254 matrix table = r(table)
255 matrix depressymp_FI_men = [depressymp_FI_men \ table[1,1] , table[
5,1] , table[6,1]]
256 mean ds_W5 if sample == 1 & female == 0 & food_secureW5 == 1 [aw=
w5_nc_bp_pweight_s]
257 matrix table = r(table)
258 matrix depressymp_FI_men = [depressymp_FI_men \ table[1,1] , table[
5,1] , table[6,1]]

259
260 matrix rownames depressymp_FI_men = "Wave 2" "Wave 3" "Wave 5"
261
262 coefplot (matrix(depressymp_FS_men[,1]), ci((2 3)) /*
263     */label("Food secure")) /*
264     *//(matrix(depressymp_mFS_men[,1]), ci((2 3)) /*
265     */label("Marginally food secure")) /*
266     *//(matrix(depressymp_FI_men[,1]), ci((2 3)) /*
267     */label("Low/very low food security")), /*
268     */ylabel(1(.5)3, angle(0) format(%12.2f) labsize(small)) /*
269     */xlabel(,labsize(small)) /*
270     */ytitle("Average self-reported depressive symptoms", size(
small)) /*
271     */legend(size(small) rows(1)) /*
272     */ciopts(recast(rcap)) recast(connected) citop vertical
nooffset /*
273     *//saving(depress_symp_FS_men.gph, replace)
274
275 mean ds_W2 if sample == 1 & female == 1 & foodsecurityW21 == 1 [aw=
w5_nc_bp_pweight_s]
276 matrix table = r(table)
277 matrix depressymp_FS_women = [table[1,1] , table[5,1] , table[6,1]]
278 mean ds_W3 if sample == 1 & female == 1 & foodsecurityW31 == 1 [aw
=w5_nc_bp_pweight_s]
279 matrix table = r(table)
280 matrix depressymp_FS_women = [depressymp_FS_women \ table[1,1] ,
table[5,1] , table[6,1]]
281 mean ds_W5 if sample == 1 & female == 1 & foodsecurityW51 == 1 [aw
=w5_nc_bp_pweight_s]
282 matrix table = r(table)
283 matrix depressymp_FS_women = [depressymp_FS_women \ table[1,1] ,
table[5,1] , table[6,1]]
284 mean ds_W2 if sample == 1 & female == 1 & foodsecurityW22 == 1 [aw=
w5_nc_bp_pweight_s]
285 matrix table = r(table)
286
287 matrix rownames depressymp_FS_women = "Wave 2" "Wave 3" "Wave 5"

```



```

288
289 matrix depressymp_mFS_women = [table[1,1] , table[5,1] , table[6,1]]
290 mean ds_W3 if sample == 1 & female == 1 & foodsecurityW32 == 1 [aw
=w5_nc_bp_pweight_s]
291 matrix table = r(table)
292 matrix depressymp_mFS_women = [depressymp_mFS_women \ table[1,1] ,
table[5,1] , table[6,1]]
293 mean ds_W5 if sample == 1 & female == 1 & foodsecurityW52 == 1 [aw
=w5_nc_bp_pweight_s]
294 matrix table = r(table)
295 matrix depressymp_mFS_women = [depressymp_mFS_women \ table[1,1] ,
table[5,1] , table[6,1]]
296 mean ds_W2 if sample == 1 & female == 1 & food_secureW2 == 1 [aw=
w5_nc_bp_pweight_s]
297 matrix table = r(table)
298
299 matrix rownames depressymp_mFS_women = "Wave 2" "Wave 3" "Wave 5"
300
301 matrix depressymp_FI_women = [table[1,1] , table[5,1] , table[6,1]]
302 mean ds_W3 if sample == 1 & female == 1 & food_secureW3 == 1 [aw=
w5_nc_bp_pweight_s]
303 matrix table = r(table)
304 matrix depressymp_FI_women = [depressymp_FI_women \ table[1,1] ,
table[5,1] , table[6,1]]
305 mean ds_W5 if sample == 1 & female == 1 & food_secureW5 == 1 [aw=
w5_nc_bp_pweight_s]
306 matrix table = r(table)
307 matrix depressymp_FI_women = [depressymp_FI_women \ table[1,1] ,
table[5,1] , table[6,1]]
308
309 matrix rownames depressymp_FI_women = "Wave 2" "Wave 3" "Wave 5"
310
311 coefplot (matrix(depressymp_FS_women[,1]), ci((2 3)) /*
312     */label("Food secure")) /*
313     */(matrix(depressymp_mFS_women[,1]), ci((2 3)) /*
314     */label("Marginally food secure")) /*
315     */(matrix(depressymp_FI_women[,1]), ci((2 3)) /*
316     */label("Low/very low food security")), /*
317     */ylabel(1(.5)3, angle(0) format(%12.2f) labsize(small)) xlabel
(,labsize(small)) /*
318     */ytitle("Average self-reported depressive symptoms", size(
small)) /*
319     */legend(size(small) rows(1)) /*
320     */ciopts(recast(rcap)) recast(connected) citop vertical
nooffset /*
321     */saving(depress_symp_FS_women.gph, replace)
322
323 graph combine depress_symp_FS_men.gph depress_symp_FS_women.gph,

```

rows(1)

```

324
325 *****
326 *****SEM
ANALYSES*****
327 *****
328
329 *****
330 *****----- WOMEN SAMPLE -----*****
331 *****
332
333 *****
334 *****----- ML-SEM -----*****
335 *****
336
337 eststo MLSEM_women: sem (ds_W3 <- nkids6W3@b2 nkids7to17W3@b3
childcare_capW3@b4 live_spouseW3@b5 /*
338 */ employOct@b6 empl_mainincomeW3@b7 grant_mainincomeW3@b8 /*
339 */ foodsecurityW32@b9 food_secureW3@b10 /*
340 */ atriskW31@b12 atriskW33@b13 support_ngo_W3@b14
support_com_W3@b15 /*
341 */ african@b16 coloured@b17 educ1@b18 educ3@b19 educ4@b20) /*
342 */ (ds_W5 <- nkids6W5@b2 nkids7to17W5@b3 childcare_capW5@b4
live_spouseW5@b5 /*
343 */ employMar@b6 empl_mainincomeW5@b7 grant_mainincomeW5@b8 /*
344 */ foodsecurityW52@b9 food_secureW5@b10 /*
345 */ atriskW51@b12 atriskW53@b13 support_ngo_W5@b14
support_com_W5@b15 /*
346 */ african@b16 coloured@b17 educ1@b18 educ3@b19 educ4@b20) /*
347 */ if female == 1 [pw=w5_nc_bp_pweight_s], /*
348 */ iterate(250) technique(nr 25 bhhh 25) noxconditional method(
mlmv)
349
350 eststo MLSEM_women: sem (ds_W3 <- nkids6W3@b2 nkids7to17W3@b3
childcare_capW3@b4 live_spouseW3@b5 /*
351 */ employOct@b6 empl_mainincomeW3@b7 grant_mainincomeW3@b8 /*
352 */ foodsecurityW32@b9 food_secureW3@b10 /*
353 */ atriskW31@b12 atriskW33@b13 support_ngo_W3@b14
support_com_W3@b15 /*
354 */ african@b16 coloured@b17 educ1@b18 educ3@b19 educ4@b20) /*
355 */ (ds_W5 <- nkids6W5@b2 nkids7to17W5@b3 childcare_capW5@b4
live_spouseW5@b5 /*
356 */ employMar@b6 empl_mainincomeW5@b7 grant_mainincomeW5@b8 /*
357 */ foodsecurityW52@b9 food_secureW5@b10 /*
358 */ atriskW51@b12 atriskW53@b13 support_ngo_W5@b14
support_com_W5@b15 /*

```

```

359     */ african@b16 coloured@b17 educ1@b18 educ3@b19 educ4@b20) /*
360     */ if female == 1 & w5_nc_bp_pweight_s! = ., iterate(250)
technique(nr 25 bhhh 25) noxconditional method(mlmv)
361
362     estat gof, stats(all)
363
364     *****
365     *****----- ML-SEM DYNAMIC -----*****
366     *****
367
368     eststo MLSEMdyn_women: sem (ds_W3 <- ds_W2@b1 nkids6W3@b2
nkids7to17W3@b3 childcare_capW3@b4 live_spouseW3@b5 /*
369     */ employOct@b6 empl_mainincomeW3@b7 grant_mainincomeW3@b8 /*
370     */ foodsecurityW32@b9 food_secureW3@b10 /*
371     */ atriskW31@b12 atriskW33@b13 support_ngo_W3@b14
support_com_W3@b15 /*
372     */ african@b16 coloured@b17 educ1@b18 educ3@b19 educ4@b20) /*
373     */ (ds_W5 <- ds_W3@b1 nkids6W5@b2 nkids7to17W5@b3
childcare_capW5@b4 live_spouseW5@b5 /*
374     */ employMar@b6 empl_mainincomeW5@b7 grant_mainincomeW5@b8 /*
375     */ foodsecurityW52@b9 food_secureW5@b10 /*
376     */ atriskW51@b12 atriskW53@b13 support_ngo_W5@b14
support_com_W5@b15 /*
377     */ african@b16 coloured@b17 educ1@b18 educ3@b19 educ4@b20) /*
378     */ if female == 1 [pw=w5_nc_bp_pweight_s], /*
379     */ iterate(250) technique(nr 25 bhhh 25) noxconditional method(
mlmv)
380
381     eststo MLSEMdyn_women: sem (ds_W3 <- ds_W2@b1 nkids6W3@b2
nkids7to17W3@b3 childcare_capW3@b4 live_spouseW3@b5 /*
382     */ employOct@b6 empl_mainincomeW3@b7 grant_mainincomeW3@b8 /*
383     */ foodsecurityW32@b9 food_secureW3@b10 /*
384     */ atriskW31@b12 atriskW33@b13 support_ngo_W3@b14
support_com_W3@b15 /*
385     */ african@b16 coloured@b17 educ1@b18 educ3@b19 educ4@b20) /*
386     */ (ds_W5 <- ds_W3@b1 nkids6W5@b2 nkids7to17W5@b3
childcare_capW5@b4 live_spouseW5@b5 /*
387     */ employMar@b6 empl_mainincomeW5@b7 grant_mainincomeW5@b8 /*
388     */ foodsecurityW52@b9 food_secureW5@b10 /*
389     */ atriskW51@b12 atriskW53@b13 support_ngo_W5@b14
support_com_W5@b15 /*
390     */ african@b16 coloured@b17 educ1@b18 educ3@b19 educ4@b20) /*
391     */ if female == 1 & w5_nc_bp_pweight_s! = ., iterate(250)
technique(nr 25 bhhh 25) noxconditional method(mlmv)
392
393     estat gof, stats(all)
394
395     *****

```

```

396 *****----- ML-SEM DYNAMIC FIXED EFFECT -----*****
397 *****
398
399 eststo MLSEMfe_women: sem (ds_W3 <- ds_W2@b1 nkids6W3@b2
nkids7to17W3@b3 childcare_capW3@b4 live_spouseW3@b5 /*
400     */ employOct@b6 empl_mainincomeW3@b7 grant_mainincomeW3@b8 /*
401     */ foodsecurityW32@b9 food_secureW3@b10 /*
402     */ atriskW31@b12 atriskW33@b13 support_ngo_W3@b14
support_com_W3@b15 /*
403     */ african@b16 coloured@b17 educ1@b18 educ3@b19 educ4@b20
Alpha@1 E2@1) /*
404     */ (ds_W5 <- ds_W3@b1 nkids6W5@b2 nkids7to17W5@b3
childcare_capW5@b4 live_spouseW5@b5 /*
405     */ employMar@b6 empl_mainincomeW5@b7 grant_mainincomeW5@b8 /*
406     */ foodsecurityW52@b9 food_secureW5@b10 /*
407     */ atriskW51@b12 atriskW53@b13 support_ngo_W5@b14
support_com_W5@b15 /*
408     */ african@b16 coloured@b17 educ1@b18 educ3@b19 educ4@b20
Alpha@1) /*
409     */ if female == 1 [pw=w5_nc_bp_pweight_s], /*
410     */ var(e.ds_W3@0) var(Alpha) cov(Alpha*(african coloured educ1
educ3 educ4)@0 Alpha*(E2)@0 _0Ex*(E2)@0) iterate(250) technique(nr
25 bhhh 25) noxconditional method(mlmv)
411
412 eststo MLSEMfe_women: sem (ds_W3 <- ds_W2@b1 nkids6W3@b2
nkids7to17W3@b3 childcare_capW3@b4 live_spouseW3@b5 /*
413     */ employOct@b6 empl_mainincomeW3@b7 grant_mainincomeW3@b8 /*
414     */ foodsecurityW32@b9 food_secureW3@b10 /*
415     */ atriskW31@b12 atriskW33@b13 support_ngo_W3@b14
support_com_W3@b15 /*
416     */ african@b16 coloured@b17 educ1@b18 educ3@b19 educ4@b20
Alpha@1 E2@1) /*
417     */ (ds_W5 <- ds_W3@b1 nkids6W5@b2 nkids7to17W5@b3
childcare_capW5@b4 live_spouseW5@b5 /*
418     */ employMar@b6 empl_mainincomeW5@b7 grant_mainincomeW5@b8 /*
419     */ foodsecurityW52@b9 food_secureW5@b10 /*
420     */ atriskW51@b12 atriskW53@b13 support_ngo_W5@b14
support_com_W5@b15 /*
421     */ african@b16 coloured@b17 educ1@b18 educ3@b19 educ4@b20
Alpha@1) /*
422     */ if female == 1 & w5_nc_bp_pweight_s! = ., /*
423     */ var(e.ds_W3@0) var(Alpha) cov(Alpha*(african coloured educ1
educ3 educ4)@0 Alpha*(E2)@0 _0Ex*(E2)@0) iterate(250) technique(nr
25 bhhh 25) noxconditional method(mlmv)
424
425     estat gof, stats(all)
426
427 *****

```

```

428 *****----- MEN SAMPLE -----*****
429 *****
430
431 *****
432 *****----- ML-SEM -----*****
433 *****
434
435 eststo MLSEM_men: sem (ds_W3 <- nkids6W3@b2 nkids7to17W3@b3
  childcare_capW3@b4 live_spouseW3@b5 /*
436   */ employ0ct@b6 empl_mainincomeW3@b7 grant_mainincomeW3@b8 /*
437   */ foodsecurityW32@b9 food_secureW3@b10 /*
438   */ atriskW31@b12 atriskW33@b13 support_ngo_W3@b14
  support_com_W3@b15 /*
439   */ african@b16 coloured@b17 educ1@b18 educ3@b19 educ4@b20) /*
440   */ (ds_W5 <- nkids6W5@b2 nkids7to17W5@b3 childcare_capW5@b4
  live_spouseW5@b5 /*
441   */ employMar@b6 empl_mainincomeW5@b7 grant_mainincomeW5@b8 /*
442   */ foodsecurityW52@b9 food_secureW5@b10 /*
443   */ atriskW51@b12 atriskW53@b13 support_ngo_W5@b14
  support_com_W5@b15 /*
444   */ african@b16 coloured@b17 educ1@b18 educ3@b19 educ4@b20) /*
445   */ if female == 0 [pw=w5_nc_bp_pweight_s], /*
446   */ iterate(250) technique(nr 25 bhhh 25) noxconditional method(
  mlmv)
447
448 sem (ds_W3 <- nkids6W3@b2 nkids7to17W3@b3 childcare_capW3@b4
  live_spouseW3@b5 /*
449   */ employ0ct@b6 empl_mainincomeW3@b7 grant_mainincomeW3@b8 /*
450   */ foodsecurityW32@b9 food_secureW3@b10 /*
451   */ atriskW31@b12 atriskW33@b13 support_ngo_W3@b14
  support_com_W3@b15 /*
452   */ african@b16 coloured@b17 educ1@b18 educ3@b19 educ4@b20) /*
453   */ (ds_W5 <- nkids6W5@b2 nkids7to17W5@b3 childcare_capW5@b4
  live_spouseW5@b5 /*
454   */ employMar@b6 empl_mainincomeW5@b7 grant_mainincomeW5@b8 /*
455   */ foodsecurityW52@b9 food_secureW5@b10 /*
456   */ atriskW51@b12 atriskW53@b13 support_ngo_W5@b14
  support_com_W5@b15 /*
457   */ african@b16 coloured@b17 educ1@b18 educ3@b19 educ4@b20) /*
458   */ if female == 0 & w5_nc_bp_pweight_s! = ., /*
459   */ iterate(250) technique(nr 25 bhhh 25) noxconditional method(
  mlmv)
460
461   estat gof, stats(all)
462
463 *****
464 *****----- ML-SEM DYNAMIC -----*****
465 *****

```

```

466
467 eststo MLSEMDyn_men: sem (ds_W3 <- ds_W2@b1 nkids6W3@b2
nkids7to17W3@b3 childcare_capW3@b4 live_spouseW3@b5 /*
468     */ employOct@b6 empl_mainincomeW3@b7 grant_mainincomeW3@b8 /*
469     */ foodsecurityW32@b9 food_secureW3@b10 /*
470     */ atriskW31@b12 atriskW33@b13 support_ngo_W3@b14
support_com_W3@b15 /*
471     */ african@b16 coloured@b17 educ1@b18 educ3@b19 educ4@b20) /*
472     */ (ds_W5 <- ds_W3@b1 nkids6W5@b2 nkids7to17W5@b3
childcare_capW5@b4 live_spouseW5@b5 /*
473     */ employMar@b6 empl_mainincomeW5@b7 grant_mainincomeW5@b8 /*
474     */ foodsecurityW52@b9 food_secureW5@b10 /*
475     */ atriskW51@b12 atriskW53@b13 support_ngo_W5@b14
support_com_W5@b15 /*
476     */ african@b16 coloured@b17 educ1@b18 educ3@b19 educ4@b20) /*
477     */ if female == 0 [pw=w5_nc_bp_pweight_s], /*
478     */ iterate(250) technique(nr 25 bhhh 25) noxconditional method(
mlmv)
479
480 eststo MLSEMDyn_men: sem (ds_W3 <- ds_W2@b1 nkids6W3@b2
nkids7to17W3@b3 childcare_capW3@b4 live_spouseW3@b5 /*
481     */ employOct@b6 empl_mainincomeW3@b7 grant_mainincomeW3@b8 /*
482     */ foodsecurityW32@b9 food_secureW3@b10 /*
483     */ atriskW31@b12 atriskW33@b13 support_ngo_W3@b14
support_com_W3@b15 /*
484     */ african@b16 coloured@b17 educ1@b18 educ3@b19 educ4@b20) /*
485     */ (ds_W5 <- ds_W3@b1 nkids6W5@b2 nkids7to17W5@b3
childcare_capW5@b4 live_spouseW5@b5 /*
486     */ employMar@b6 empl_mainincomeW5@b7 grant_mainincomeW5@b8 /*
487     */ foodsecurityW52@b9 food_secureW5@b10 /*
488     */ atriskW51@b12 atriskW53@b13 support_ngo_W5@b14
support_com_W5@b15 /*
489     */ african@b16 coloured@b17 educ1@b18 educ3@b19 educ4@b20) /*
490     */ if female == 0 & w5_nc_bp_pweight_s! = ., /*
491     */ iterate(250) technique(nr 25 bhhh 25) noxconditional method(
mlmv)
492
493     estat gof, stats(all)
494
495 *****
496 *****----- ML-SEM DYNAMIC FIXED EFFECT -----*****
497 *****
498
499 eststo MLSEMfe_men: sem (ds_W3 <- ds_W2@b1 nkids6W3@b2
nkids7to17W3@b3 childcare_capW3@b4 live_spouseW3@b5 /*
500     */ employOct@b6 empl_mainincomeW3@b7 grant_mainincomeW3@b8 /*
501     */ foodsecurityW32@b9 food_secureW3@b10 /*
502     */ atriskW31@b12 atriskW33@b13 support_ngo_W3@b14

```

```

support_com_W3@b15 /*
503   */ african@b16 coloured@b17 educ1@b18 educ3@b19 educ4@b20
Alpha@1 E2@1) /*
504   */ (ds_W5 <- ds_W3@b1 nkids6W5@b2 nkids7to17W5@b3
childcare_capW5@b4 live_spouseW5@b5 /*
505   */ employMar@b6 empl_mainincomeW5@b7 grant_mainincomeW5@b8 /*
506   */ foodsecurityW52@b9 food_secureW5@b10 /*
507   */ atriskW51@b12 atriskW53@b13 support_ngo_W5@b14
support_com_W5@b15 /*
508   */ african@b16 coloured@b17 educ1@b18 educ3@b19 educ4@b20
Alpha@1) /*
509   */ if female == 0 [pw=w5_nc_bp_pweight_s], /*
510   */ var(e.ds_W3@0) var(Alpha) cov(Alpha*(african coloured educ1
educ3 educ4)@0 Alpha*(E2)@0 _0Ex*(E2)@0) iterate(250) technique(nr
25 bhhh 25) noxconditional method(mlmv)
511
512 eststo MLSEMfe_men: sem (ds_W3 <- ds_W2@b1 nkids6W3@b2
nkids7to17W3@b3 childcare_capW3@b4 live_spouseW3@b5 /*
513   */ employ0ct@b6 empl_mainincomeW3@b7 grant_mainincomeW3@b8 /*
514   */ foodsecurityW32@b9 food_secureW3@b10 /*
515   */ atriskW31@b12 atriskW33@b13 support_ngo_W3@b14
support_com_W3@b15 /*
516   */ african@b16 coloured@b17 educ1@b18 educ3@b19 educ4@b20
Alpha@1 E2@1) /*
517   */ (ds_W5 <- ds_W3@b1 nkids6W5@b2 nkids7to17W5@b3
childcare_capW5@b4 live_spouseW5@b5 /*
518   */ employMar@b6 empl_mainincomeW5@b7 grant_mainincomeW5@b8 /*
519   */ foodsecurityW52@b9 food_secureW5@b10 /*
520   */ atriskW51@b12 atriskW53@b13 support_ngo_W5@b14
support_com_W5@b15 /*
521   */ african@b16 coloured@b17 educ1@b18 educ3@b19 educ4@b20
Alpha@1) /*
522   */ if female == 0 & w5_nc_bp_pweight_s!=., /*
523   */ var(e.ds_W3@0) var(Alpha) cov(Alpha*(african coloured educ1
educ3 educ4)@0 Alpha*(E2)@0 _0Ex*(E2)@0) iterate(250) technique(nr
25 bhhh 25) noxconditional method(mlmv)
524
525   estat gof, stats(all)
526
527 *****
528 **Table A1
529 esttab MLSEM_women MLSEMdyn_women MLSEMfe_women MLSEM_men
MLSEMdyn_men MLSEMfe_men using TableA1.txt, se wide starlevels(+
0.10 * 0.05 ** 0.01 *** 0.001) stats(N_sub N_subpop)
530 *****
531
532 *****
533 *****----- PARENTS vs CHILDLESS -----*****

```

```

534 *****
535
536 *****
537 *****----- ML-SEM DYNAMIC -----*****
538 *****
539
540 eststo MLSEMDyn_women_childless: sem (ds_W3 <- ds_W2@b1 nkids6W3@b2
    nkids7to17W3@b3 childcare_capW3@b4 live_spouseW3@b5 /*
541     */ employOct@b6 empl_mainincomeW3@b7 grant_mainincomeW3@b8 /*
542     */ foodsecurityW32@b9 food_secureW3@b10 /*
543     */ atriskW31@b12 atriskW33@b13 support_ngo_W3@b14
support_com_W3@b15 /*
544     */ african@b16 coloured@b17 educ1@b18 educ3@b19 educ4@b20) /*
545     */ (ds_W5 <- ds_W3@b1 nkids6W5@b2 nkids7to17W5@b3
childcare_capW5@b4 live_spouseW5@b5 /*
546     */ employMar@b6 empl_mainincomeW5@b7 grant_mainincomeW5@b8 /*
547     */ foodsecurityW52@b9 food_secureW5@b10 /*
548     */ atriskW51@b12 atriskW53@b13 support_ngo_W5@b14
support_com_W5@b15 /*
549     */ african@b16 coloured@b17 educ1@b18 educ3@b19 educ4@b20) /*
550     */ if female == 1 & have_kids == 0 [pw=w5_nc_bp_pweight_s], /*
551     */ iterate(250) technique(nr 25 bhhh 25) noxconditional method(
mlmv)
552
553 predict y1 y2 if female == 1 & have_kids == 0 & w5_nc_bp_pweight_s
! =.
554 drop y1
555 ren y2 predict_women_childless
556
557 eststo MLSEMDyn_mothers: sem (ds_W3 <- ds_W2@b1 nkids6W3@b2
nkids7to17W3@b3 childcare_capW3@b4 live_spouseW3@b5 /*
558     */ employOct@b6 empl_mainincomeW3@b7 grant_mainincomeW3@b8 /*
559     */ foodsecurityW32@b9 food_secureW3@b10 /*
560     */ atriskW31@b12 atriskW33@b13 support_ngo_W3@b14
support_com_W3@b15 /*
561     */ african@b16 coloured@b17 educ1@b18 educ3@b19 educ4@b20) /*
562     */ (ds_W5 <- ds_W3@b1 nkids6W5@b2 nkids7to17W5@b3
childcare_capW5@b4 live_spouseW5@b5 /*
563     */ employMar@b6 empl_mainincomeW5@b7 grant_mainincomeW5@b8 /*
564     */ foodsecurityW52@b9 food_secureW5@b10 /*
565     */ atriskW51@b12 atriskW53@b13 support_ngo_W5@b14
support_com_W5@b15 /*
566     */ african@b16 coloured@b17 educ1@b18 educ3@b19 educ4@b20) /*
567     */ if female == 1 & have_kids == 1 [pw=w5_nc_bp_pweight_s], /*
568     */ iterate(250) technique(nr 25 bhhh 25) noxconditional method(
mlmv)
569
570 predict y1 y2 if female == 1 & have_kids == 1 & w5_nc_bp_pweight_s

```



```

!=.
571 drop y1
572 ren y2 predict_mothers
573
574 eststo MLSEMdyn_men_childless: sem (ds_W3 <- ds_W2@b1 nkids6W3@b2
nkids7to17W3@b3 childcare_capW3@b4 live_spouseW3@b5 /*
575     */ employOct@b6 empl_mainincomeW3@b7 grant_mainincomeW3@b8 /*
576     */ foodsecurityW32@b9 food_secureW3@b10 /*
577     */ atriskW31@b12 atriskW33@b13 support_ngo_W3@b14
support_com_W3@b15 /*
578     */ african@b16 coloured@b17 educ1@b18 educ3@b19 educ4@b20) /*
579     */ (ds_W5 <- ds_W3@b1 nkids6W5@b2 nkids7to17W5@b3
childcare_capW5@b4 live_spouseW5@b5 /*
580     */ employMar@b6 empl_mainincomeW5@b7 grant_mainincomeW5@b8 /*
581     */ foodsecurityW52@b9 food_secureW5@b10 /*
582     */ atriskW51@b12 atriskW53@b13 support_ngo_W5@b14
support_com_W5@b15 /*
583     */ african@b16 coloured@b17 educ1@b18 educ3@b19 educ4@b20) /*
584     */ if female == 0 & have_kids == 0 [pw=w5_nc_bp_pweight_s], /*
585     */ iterate(250) technique(nr 25 bhhh 25) noxconditional method(
mlmv)
586
587 predict y1 y2 if female == 0 & have_kids == 0 & w5_nc_bp_pweight_s
!=.
588 drop y1
589 ren y2 predict_men_childless
590
591 eststo MLSEMdyn_fathers: sem (ds_W3 <- ds_W2@b1 nkids6W3@b2
nkids7to17W3@b3 childcare_capW3@b4 live_spouseW3@b5 /*
592     */ employOct@b6 empl_mainincomeW3@b7 grant_mainincomeW3@b8 /*
593     */ foodsecurityW32@b9 food_secureW3@b10 /*
594     */ atriskW31@b12 atriskW33@b13 support_ngo_W3@b14
support_com_W3@b15 /*
595     */ african@b16 coloured@b17 educ1@b18 educ3@b19 educ4@b20) /*
596     */ (ds_W5 <- ds_W3@b1 nkids6W5@b2 nkids7to17W5@b3
childcare_capW5@b4 live_spouseW5@b5 /*
597     */ employMar@b6 empl_mainincomeW5@b7 grant_mainincomeW5@b8 /*
598     */ foodsecurityW52@b9 food_secureW5@b10 /*
599     */ atriskW51@b12 atriskW53@b13 support_ngo_W5@b14
support_com_W5@b15 /*
600     */ african@b16 coloured@b17 educ1@b18 educ3@b19 educ4@b20) /*
601     */ if female == 0 & have_kids == 1 [pw=w5_nc_bp_pweight_s], /*
602     */ iterate(250) technique(nr 25 bhhh 25) noxconditional method(
mlmv)
603
604 predict y1 y2 if female == 0 & have_kids == 1 & w5_nc_bp_pweight_s
!=.
605 drop y1

```

```

606 ren y2 predict_fathers
607
608 *****
609 *****----- ML-SEM DYNAMIC FIXED EFFECT -----*****
610 *****
611
612 eststo MLSEMfe_women_childless: sem (ds_W3 <- ds_W2@b1 nkids6W3@b2
nkids7to17W3@b3 childcare_capW3@b4 live_spouseW3@b5 /*
613     */ employOct@b6 empl_mainincomeW3@b7 grant_mainincomeW3@b8 /*
614     */ foodsecurityW32@b9 food_secureW3@b10 /*
615     */ atriskW31@b12 atriskW33@b13 support_ngo_W3@b14
support_com_W3@b15 /*
616     */ african@b16 coloured@b17 educ1@b18 educ3@b19 educ4@b20
Alpha@1 E2@1) /*
617     */ (ds_W5 <- ds_W3@b1 nkids6W5@b2 nkids7to17W5@b3
childcare_capW5@b4 live_spouseW5@b5 /*
618     */ employMar@b6 empl_mainincomeW5@b7 grant_mainincomeW5@b8 /*
619     */ foodsecurityW52@b9 food_secureW5@b10 /*
620     */ atriskW51@b12 atriskW53@b13 support_ngo_W5@b14
support_com_W5@b15 /*
621     */ african@b16 coloured@b17 educ1@b18 educ3@b19 educ4@b20
Alpha@1) /*
622     */ if female == 1 & have_kids == 0 [pw=w5_nc_bp_pweight_s], /*
623     */ var(e.ds_W3@0) var(Alpha) cov(Alpha*(african coloured educ1
educ3 educ4)@0 Alpha*(E2)@0 _OEx*(E2)@0) iterate(250) technique(nr
25 bhhh 25) noxconditional method(mlmv)
624
625 predict y1 y2 if female == 1 & have_kids == 0 & w5_nc_bp_pweight_s
!=.
626 drop y1
627 ren y2 temp
628
629 predict y1 if female == 1 & have_kids == 0 & w5_nc_bp_pweight_s!=.,
lat(Alpha)
630 gen predict_women_childless_excl_fe = temp-y1
631 drop y1 temp
632
633 eststo MLSEMfe_mothers: sem (ds_W3 <- ds_W2@b1 nkids6W3@b2
/*nkids7to17W3@b3*/ childcare_capW3@b4 live_spouseW3@b5 /*
634     */ employOct@b6 empl_mainincomeW3@b7 grant_mainincomeW3@b8 /*
635     */ foodsecurityW32@b9 food_secureW3@b10 /*
636     */ atriskW31@b12 atriskW33@b13 support_ngo_W3@b14
support_com_W3@b15 /*
637     */ african@b16 coloured@b17 educ1@b18 educ3@b19 educ4@b20
Alpha@1 E2@1) /*
638     */ (ds_W5 <- ds_W3@b1 nkids6W5@b2 /*nkids7to17W5@b3*/
childcare_capW5@b48 live_spouseW5@b5 /*
639     */ employMar@b6 empl_mainincomeW5@b7 grant_mainincomeW5@b8 /*

```

```

640     */ foodsecurityW52@b9 food_secureW5@b10 /*
641     */ atriskW51@b12 atriskW53@b13 support_ngo_W5@b14
support_com_W5@b15 /*
642     */ african@b16 coloured@b17 educ1@b18 educ3@b19 educ4@b20
Alpha@1) /*
643     */ if female == 1 & have_kids == 1 [pw=w5_nc_bp_pweight_s], /*
644     */ var(e.ds_W3@0) var(Alpha) cov(Alpha*(african coloured educ1
educ3 educ4)@0 Alpha*(E2)@0 _0Ex*(E2)@0) iterate(250) technique(nr
25 bhhh 25) noxconditional method(mlmv)
645
646 predict y1 y2 if female == 1 & have_kids == 1 & w5_nc_bp_pweight_s
!=.
647 drop y1
648 ren y2 temp
649
650 predict y1 if female == 1 & have_kids == 1 & w5_nc_bp_pweight_s!=.,
lat(Alpha)
651 gen predict_mothers_excl_fe = temp-y1
652 drop y1 temp
653
654 eststo MLSEMfe_men_childless: sem (ds_W3 <- ds_W2@b1 nkids6W3@b2
nkids7to17W3@b3 childcare_capW3@b4 live_spouseW3@b5 /*
655     */ employOct@b6 empl_mainincomeW3@b7 grant_mainincomeW3@b8 /*
656     */ foodsecurityW32@b9 food_secureW3@b10 /*
657     */ atriskW31@b12 atriskW33@b13 support_ngo_W3@b14
support_com_W3@b15 /*
658     */ african@b16 coloured@b17 educ1@b18 educ3@b19 educ4@b20
Alpha@1 E2@1) /*
659     */ (ds_W5 <- ds_W3@b1 nkids6W5@b2 nkids7to17W5@b3
childcare_capW5@b4 live_spouseW5@b5 /*
660     */ employMar@b6 empl_mainincomeW5@b7 grant_mainincomeW5@b8 /*
661     */ foodsecurityW52@b9 food_secureW5@b10 /*
662     */ atriskW51@b12 atriskW53@b13 support_ngo_W5@b14
support_com_W5@b15 /*
663     */ african@b16 coloured@b17 educ1@b18 educ3@b19 educ4@b20
Alpha@1) /*
664     */ if female == 0 & have_kids == 0 [pw=w5_nc_bp_pweight_s], /*
665     */ var(e.ds_W3@0) var(Alpha) cov(Alpha*(african coloured educ1
educ3 educ4)@0 Alpha*(E2)@0 _0Ex*(E2)@0) iterate(250) technique(nr
25 bhhh 25) noxconditional method(mlmv)
666
667 predict y1 y2 if female == 0 & have_kids == 0 & w5_nc_bp_pweight_s
!=.
668 drop y1
669 ren y2 temp
670
671 predict y1 if female == 0 & have_kids == 0 & w5_nc_bp_pweight_s!=.,
lat(Alpha)

```

```

672 gen predict_men_childless_excl_fe = temp-y1
673 drop y1 temp
674
675 eststo MLSEMfe_fathers: sem (ds_W3 <- ds_W2@b1 nkids6W3@b2
nkids7to17W3@b3 childcare_capW3@b4 live_spouseW3@b5 /*
676     */ employ0ct@b6 empl_mainincomeW3@b7 grant_mainincomeW3@b8 /*
677     */ foodsecurityW32@b9 food_secureW3@b10 /*
678     */ atriskW31@b12 atriskW33@b13 support_ngo_W3@b14
support_com_W3@b15 /*
679     */ african@b16 coloured@b17 educ1@b18 educ3@b19 educ4@b20
Alpha@1 E2@1) /*
680     */ (ds_W5 <- ds_W3@b1 nkids6W5@b2 nkids7to17W5@b3
childcare_capW5@b4 live_spouseW5@b5 /*
681     */ employMar@b6 empl_mainincomeW5@b7 grant_mainincomeW5@b8 /*
682     */ foodsecurityW52@b9 food_secureW5@b10 /*
683     */ atriskW51@b12 atriskW53@b13 support_ngo_W5@b14
support_com_W5@b15 /*
684     */ african@b16 coloured@b17 educ1@b18 educ3@b19 educ4@b20
Alpha@1) /*
685     */ if female == 0 & have_kids == 1 [pw=w5_nc_bp_pweight_s], /*
686     */ var(e.ds_W3@0) var(Alpha) cov(Alpha*(african coloured educ1
educ3 educ4)@0 Alpha*(E2)@0 _OEx*(E2)@0) iterate(250) technique(nr
25 bhhd 25) noxconditional method(mlmv)
687
688 predict y1 y2 if female == 0 & have_kids == 1 & w5_nc_bp_pweight_s
! = .
689 drop y1
690 ren y2 temp
691
692 predict y1 if female == 0 & have_kids == 1 & w5_nc_bp_pweight_s! = .,
    lat(Alpha)
693 gen predict_fathers_excl_fe = temp-y1
694 drop y1 temp
695
696 qui reg predict_women_childless i.foodsecurityW52 i.food_secureW5
697 margins i.food_secureW5#i.foodsecurityW52
698 matrix table = r(table)
699 matrix women_childless = [table[1,1] , table[5,1] , table[6,1] \
table[1,2] , table[5,2] , table[6,2] \ table[1,3] , table[5,3] ,
table[6,3]]
700 matrix rownames women_childless = "Full" "Marginal" "Low/Very low"
701
702 qui reg predict_mothers i.foodsecurityW52 i.food_secureW5
703 margins i.food_secureW5#i.foodsecurityW52
704 matrix table = r(table)
705 matrix mothers = [table[1,1] , table[5,1] , table[6,1] \ table[1,2]
, table[5,2] , table[6,2] \ table[1,3] , table[5,3] , table[6,3]]
706 matrix rownames mothers = "Full" "Marginal" "Low/Very low"

```

```

707
708 qui reg predict_men_childless i.foodsecurityW52 i.food_secureW5
709 margins i.food_secureW5#i.foodsecurityW52
710 matrix table = r(table)
711 matrix men_childless = [table[1,1] , table[5,1] , table[6,1] \
table[1,2] , table[5,2] , table[6,2] \ table[1,3] , table[5,3] ,
table[6,3]]
712 matrix rownames men_childless = "Full" "Marginal" "Low/Very low"
713
714 qui reg predict_fathers i.foodsecurityW52 i.food_secureW5
715 margins i.food_secureW5#i.foodsecurityW52
716 matrix table = r(table)
717 matrix fathers = [table[1,1] , table[5,1] , table[6,1] \ table[1,2]
, table[5,2] , table[6,2] \ table[1,3] , table[5,3] , table[6,3]]
718 matrix rownames fathers = "Full" "Marginal" "Low/Very low"
719
720 **Figure 4A
721 coefplot (matrix(women_childless[,1]), ci((2 3)) /*
722     */label("Childless women")) /*
723     */(matrix(mothers[,1]), ci((2 3)) /*
724     */label("Mothers")), /*
725     */ciopts(recast(rcap)) recast(connected) citop vertical
nooffset /*
726     */ylabel(1.0(.4)2.6, angle(0) format(%12.2f) labsize(small))
xlabel(,labsize(small)) /*
727     */legend(size(small)) /*
728     */saving(Fig4A.gph, replace)
729
730 **Figure 4B
731 coefplot (matrix(men_childless[,1]), ci((2 3)) /*
732     */label("Childless men")) /*
733     */(matrix(fathers[,1]), ci((2 3)) /*
734     */label("Fathers")), /*
735     */ciopts(recast(rcap)) recast(connected) citop vertical
nooffset /*
736     */ylabel(1.0(.4)2.6, angle(0) format(%12.2f) labsize(small))
xlabel(,labsize(small)) /*
737     */legend(size(small)) /*
738     */saving(Fig4B.gph, replace)
739
740 graph combine Fig4A.gph Fig4B.gph, rows(1)
741
742 qui reg predict_women_childless_excl_fe i.foodsecurityW52 i.
food_secureW5
743 margins i.food_secureW5#i.foodsecurityW52
744 matrix table = r(table)
745 matrix women_childless_excl_fe = [table[1,1] , table[5,1] , table[6
,1] \ table[1,2] , table[5,2] , table[6,2] \ table[1,3] , table[5,3

```

```

] , table[6,3]]
746 matrix rownames women_childless_excl_fe = "Full" "Marginal"
"Low/Very low"
747
748 qui reg predict_mothers_excl_fe i.foodsecurityW52 i.food_secureW5
749 margins i.food_secureW5#i.foodsecurityW52
750 matrix table = r(table)
751 matrix mothers_excl_fe = [table[1,1] , table[5,1] , table[6,1] \
table[1,2] , table[5,2] , table[6,2] \ table[1,3] , table[5,3] ,
table[6,3]]
752 matrix rownames mothers_excl_fe = "Full" "Marginal" "Low/Very low"
753
754 qui reg predict_men_childless_excl_fe i.foodsecurityW52 i.
food_secureW5
755 margins i.food_secureW5#i.foodsecurityW52
756 matrix table = r(table)
757 matrix men_childless_excl_fe = [table[1,1] , table[5,1] , table[6,1]
] \ table[1,2] , table[5,2] , table[6,2] \ table[1,3] , table[5,3]
, table[6,3]]
758 matrix rownames men_childless_excl_fe = "Full" "Marginal"
"Low/Very low"
759
760 qui reg predict_fathers_excl_fe i.foodsecurityW52 i.food_secureW5
761 margins i.food_secureW5#i.foodsecurityW52
762 matrix table = r(table)
763 matrix fathers_excl_fe = [table[1,1] , table[5,1] , table[6,1] \
table[1,2] , table[5,2] , table[6,2] \ table[1,3] , table[5,3] ,
table[6,3]]
764 matrix rownames fathers_excl_fe = "Full" "Marginal" "Low/Very low"
765
766 **Figure 4C
767 coefplot (matrix(women_childless_excl_fe[,1]), ci((2 3)) /*
768     */label("Childless women")) /*
769     */(matrix(mothers_excl_fe[,1]), ci((2 3)) /*
770     */label("Mothers")), /*
771     */ciopts(recast(rcap)) recast(connected) citop vertical
nooffset /*
772     */ylabel(1.0(.4)2.6, angle(0) format(%12.2f) labszsize(small))
xlabel(,labszsize(small)) /*
773     */legend(size(small)) /*
774     */saving(Fig4C.gph, replace)
775
776 **Figure 4D
777 coefplot (matrix(men_childless_excl_fe[,1]), ci((2 3)) /*
778     */label("Childless men")) /*
779     */(matrix(fathers_excl_fe[,1]), ci((2 3)) /*
780     */label("Fathers")), /*
781     */ylabel(1.0(.4)2.6, angle(0) format(%12.2f) labszsize(small))

```

```

xlabel(,labsize(small)) /*
782     */legend(size(small)) /*
783     */ciopts(recast(rcap)) recast(connected) citop vertical
nooffset /*
784     */saving(Fig4D.gph, replace)
785
786 graph combine Fig4A.gph Fig4B.gph Fig4C.gph Fig4D.gph, rows(2)
xsize(16) ysize(12)
787
788 *****
789 *****----- MARITAL STATUS -----*****
790 *****
791
792 *****
793 *****----- ML-SEM DYNAMIC -----*****
794 *****
795
796 eststo MLSEMdyn_women_marr: sem (ds_W3 <- ds_W2@b1 nkids6W3@b2
nkids7to17W3@b3 childcare_capW3@b4 /*live_spouseW3@b5*/ /*
797     */ employOct@b6 empl_mainincomeW3@b7 grant_mainincomeW3@b8 /*
798     */ foodsecurityW32@b9 food_secureW3@b10 /*
799     */ atriskW31@b12 atriskW33@b13 support_ngo_W3@b14
support_com_W3@b15 /*
800     */ african@b16 coloured@b17 educ1@b18 educ3@b19 educ4@b20) /*
801     */ (ds_W5 <- ds_W3@b1 nkids6W5@b2 nkids7to17W5@b3
childcare_capW5@b4 /*live_spouseW5@b5*/ /*
802     */ employMar@b6 empl_mainincomeW5@b7 grant_mainincomeW5@b8 /*
803     */ foodsecurityW52@b9 food_secureW5@b10 /*
804     */ atriskW51@b12 atriskW53@b13 support_ngo_W5@b14
support_com_W5@b15 /*
805     */ african@b16 coloured@b17 educ1@b18 educ3@b19 educ4@b20) /*
806     */ if female == 1 & continuous_cohabitate==1 [pw=
w5_nc_bp_pweight_s], /*
807     */ iterate(250) technique(nr 25 bhhh 25) noxconditional method(
mlmv)
808
809 predict y1 y2 if female == 1 & continuous_cohabitate == 1 &
w5_nc_bp_pweight_s!=.
810 drop y1
811 ren y2 predict_women_marr
812
813 eststo MLSEMdyn_women_single: sem (ds_W3 <- ds_W2@b1 nkids6W3@b2
nkids7to17W3@b3 childcare_capW3@b4 /*live_spouseW3@b5*/ /*
814     */ employOct@b6 empl_mainincomeW3@b7 grant_mainincomeW3@b8 /*
815     */ foodsecurityW32@b9 food_secureW3@b10 /*
816     */ atriskW31@b12 atriskW33@b13 support_ngo_W3@b14
support_com_W3@b15 /*
817     */ african@b16 coloured@b17 educ1@b18 educ3@b19 educ4@b20) /*

```

```

818     */ (ds_W5 <- ds_W3@b1 nkids6W5@b2 nkids7to17W5@b3
childcare_capW5@b4 /*live_spouseW5@b5*/ /*
819     */ employMar@b6 empl_mainincomeW5@b7 grant_mainincomeW5@b8 /*
820     */ foodsecurityW52@b9 food_secureW5@b10 /*
821     */ atriskW51@b12 atriskW53@b13 support_ngo_W5@b14
support_com_W5@b15 /*
822     */ african@b16 coloured@b17 educ1@b18 educ3@b19 educ4@b20) /*
823     */ if female == 1 & continuous_cohabitate==0 &
sometimes_cohabitate==0 [pw=w5_nc_bp_pweight_s], /*
824     */ iterate(250) technique(nr 25 bhhh 25) noxconditional method(
mlmv)
825
826 predict y1 y2 if female == 1 & continuous_cohabitate==0 &
sometimes_cohabitate==0 & w5_nc_bp_pweight_s!=.
827 drop y1
828 ren y2 predict_women_single
829
830 eststo MLSEMdyn_men_marr: sem (ds_W3 <- ds_W2@b1 nkids6W3@b2
nkids7to17W3@b3 childcare_capW3@b4 /*live_spouseW3@b5*/ /*
831     */ employ0ct@b6 empl_mainincomeW3@b7 grant_mainincomeW3@b8 /*
832     */ foodsecurityW32@b9 food_secureW3@b10 /*
833     */ atriskW31@b12 atriskW33@b13 support_ngo_W3@b14
support_com_W3@b15 /*
834     */ african@b16 coloured@b17 educ1@b18 educ3@b19 educ4@b20) /*
835     */ (ds_W5 <- ds_W3@b1 nkids6W5@b2 nkids7to17W5@b3
childcare_capW5@b4 /*live_spouseW5@b5*/ /*
836     */ employMar@b6 empl_mainincomeW5@b7 grant_mainincomeW5@b8 /*
837     */ foodsecurityW52@b9 food_secureW5@b10 /*
838     */ atriskW51@b12 atriskW53@b13 support_ngo_W5@b14
support_com_W5@b15 /*
839     */ african@b16 coloured@b17 educ1@b18 educ3@b19 educ4@b20) /*
840     */ if female == 0 & continuous_cohabitate==1 [pw=
w5_nc_bp_pweight_s], /*
841     */ iterate(250) technique(nr 25 bhhh 25) noxconditional method(
mlmv)
842
843 predict y1 y2 if female == 0 & continuous_cohabitate == 1 &
w5_nc_bp_pweight_s!=.
844 drop y1
845 ren y2 predict_men_marr
846
847 eststo MLSEMdyn_men_single: sem (ds_W3 <- ds_W2@b1 nkids6W3@b2
nkids7to17W3@b3 childcare_capW3@b4 /*live_spouseW3@b5*/ /*
848     */ employ0ct@b6 empl_mainincomeW3@b7 grant_mainincomeW3@b8 /*
849     */ foodsecurityW32@b9 food_secureW3@b10 /*
850     */ atriskW31@b12 atriskW33@b13 support_ngo_W3@b14
support_com_W3@b15 /*
851     */ african@b16 coloured@b17 educ1@b18 educ3@b19 educ4@b20) /*

```



```

852     */ (ds_W5 <- ds_W3@b1 nkids6W5@b2 nkids7to17W5@b3
childcare_capW5@b4 /*live_spouseW5@b5*/ /*
853     */ employMar@b6 empl_mainincomeW5@b7 grant_mainincomeW5@b8 /*
854     */ foodsecurityW52@b9 food_secureW5@b10 /*
855     */ atriskW51@b12 atriskW53@b13 support_ngo_W5@b14
support_com_W5@b15 /*
856     */ african@b16 coloured@b17 educ1@b18 educ3@b19 educ4@b20) /*
857     */ if female == 0 & continuous_cohabitate==0 &
sometimes_cohabitate==0 [pw=w5_nc_bp_pweight_s], /*
858     */ iterate(250) technique(nr 25 bhhh 25) noxconditional method(
mlmv)
859
860 predict y1 y2 if female == 0 & continuous_cohabitate==0 &
sometimes_cohabitate==0 & w5_nc_bp_pweight_s!=.
861 drop y1
862 ren y2 predict_men_single
863
864 *****
865 *****----- ML-SEM DYNAMIC FIXED EFFECT -----*****
866 *****
867
868 eststo MLSEMfe_women_marr: sem (ds_W3 <- ds_W2@b1 nkids6W3@b2
nkids7to17W3@b3 childcare_capW3@b4 /*live_spouseW3@b5*/ /*
869     */ employOct@b6 empl_mainincomeW3@b7 grant_mainincomeW3@b8 /*
870     */ foodsecurityW32@b9 food_secureW3@b10 /*
871     */ atriskW31@b12 atriskW33@b13 support_ngo_W3@b14
support_com_W3@b15 /*
872     */ african@b16 coloured@b17 educ1@b18 educ3@b19 educ4@b20
Alpha@1 E2@1) /*
873     */ (ds_W5 <- ds_W3@b1 nkids6W5@b2 nkids7to17W5@b3
childcare_capW5@b4 /*live_spouseW5@b5*/ /*
874     */ employMar@b6 empl_mainincomeW5@b7 grant_mainincomeW5@b8 /*
875     */ foodsecurityW52@b9 food_secureW5@b10 /*
876     */ atriskW51@b12 atriskW53@b13 support_ngo_W5@b14
support_com_W5@b15 /*
877     */ african@b16 coloured@b17 educ1@b18 educ3@b19 educ4@b20
Alpha@1) /*
878     */ if female == 1 & continuous_cohabitate == 1 [pw=
w5_nc_bp_pweight_s], /*
879     */ var(e.ds_W3@0) var(Alpha) cov(Alpha*(african coloured educ1
educ3 educ4)@0 Alpha*(E2)@0 _0Ex*(E2)@0) iterate(250) technique(nr
25 bhhh 25) noxconditional method(mlmv)
880
881 predict y1 y2 if female == 1 & continuous_cohabitate == 1 &
w5_nc_bp_pweight_s!=.
882 drop y1
883 ren y2 temp
884

```

```

885 predict y1 if female == 1 & continuous_cohabitate == 1 &
w5_nc_bp_pweight_s! = ., lat(Alpha)
886 gen predict_women_marr_excl_fe = temp-y1
887 drop y1 temp
888
889 eststo MLSEMfe_women_single: sem (ds_W3 <- ds_W2@b1 nkids6W3@b2
nkids7to17W3@b3 childcare_capW3@b4 /*live_spouseW3@b5*/ /*
890     */ employOct@b6 empl_mainincomeW3@b7 grant_mainincomeW3@b8 /*
891     */ foodsecurityW32@b9 food_secureW3@b10 /*
892     */ atriskW31@b12 atriskW33@b13 support_ngo_W3@b14
support_com_W3@b15 /*
893     */ african@b16 coloured@b17 educ1@b18 educ3@b19 educ4@b20
Alpha@1 E2@1) /*
894     */ (ds_W5 <- ds_W3@b1 nkids6W5@b2 nkids7to17W5@b3
childcare_capW5@b4 /*live_spouseW5@b5*/ /*
895     */ employMar@b6 empl_mainincomeW5@b7 grant_mainincomeW5@b8 /*
896     */ foodsecurityW52@b9 food_secureW5@b10 /*
897     */ atriskW51@b12 atriskW53@b13 support_ngo_W5@b14
support_com_W5@b15 /*
898     */ african@b16 coloured@b17 educ1@b18 educ3@b19 educ4@b20
Alpha@1) /*
899     */ if female == 1 & continuous_cohabitate==0 &
sometimes_cohabitate==0 [pw=w5_nc_bp_pweight_s], /*
900     */ var(e.ds_W3@0) var(Alpha) cov(Alpha*(african coloured educ1
educ3 educ4)@0 Alpha*(E2)@0 _OEx*(E2)@0) iterate(250) technique(nr
25 bhhh 25) noxconditional method(mlmv)
901
902 predict y1 y2 if female == 1 & continuous_cohabitate==0 &
sometimes_cohabitate==0 & w5_nc_bp_pweight_s! = .
903 drop y1
904 ren y2 temp
905
906 predict y1 if female == 1 & never_married == 1 & w5_nc_bp_pweight_s
! = ., lat(Alpha)
907 gen predict_women_single_excl_fe = temp-y1
908 drop y1 temp
909
910 eststo MLSEMfe_men_marr: sem (ds_W3 <- ds_W2@b1 nkids6W3@b2
nkids7to17W3@b3 childcare_capW3@b4 /*live_spouseW3@b5*/ /*
911     */ employOct@b6 empl_mainincomeW3@b7 grant_mainincomeW3@b8 /*
912     */ foodsecurityW32@b9 food_secureW3@b10 /*
913     */ atriskW31@b12 atriskW33@b13 support_ngo_W3@b14
support_com_W3@b15 /*
914     */ african@b16 coloured@b17 educ1@b18 educ3@b19 educ4@b20
Alpha@1 E2@1) /*
915     */ (ds_W5 <- ds_W3@b1 nkids6W5@b2 nkids7to17W5@b3
childcare_capW5@b4 /*live_spouseW5@b5*/ /*
916     */ employMar@b6 empl_mainincomeW5@b7 grant_mainincomeW5@b8 /*

```

```

917     */ foodsecurityW52@b9 food_secureW5@b10 /*
918     */ atriskW51@b12 atriskW53@b13 support_ngo_W5@b14
support_com_W5@b15 /*
919     */ african@b16 coloured@b17 educ1@b18 educ3@b19 educ4@b20
Alpha@1) /*
920     */ if female == 0 & continuous_cohabitate == 1 [pw=
w5_nc_bp_pweight_s], /*
921     */ var(e.ds_W3@0) var(Alpha) cov(Alpha*(african coloured educ1
educ3 educ4)@0 Alpha*(E2)@0 _0Ex*(E2)@0) iterate(250) technique(nr
25 bhhh 25) noxconditional method(mlmv)
922
923 predict y1 y2 if female == 0 & continuous_cohabitate == 1 &
w5_nc_bp_pweight_s!=.
924 drop y1
925 ren y2 temp
926
927 predict y1 if female == 0 & continuous_cohabitate == 1 &
w5_nc_bp_pweight_s!=., lat(Alpha)
928 gen predict_men_marr_excl_fe = temp-y1
929 drop y1 temp
930
931 eststo MLSEMfe_men_single: sem (ds_W3 <- ds_W2@b1 nkids6W3@b2
nkids7to17W3@b3 childcare_capW3@b4 /*live_spouseW3@b5*/ /*
932     */ employ0ct@b6 empl_mainincomeW3@b7 grant_mainincomeW3@b8 /*
933     */ foodsecurityW32@b9 food_secureW3@b10 /*
934     */ atriskW31@b12 atriskW33@b13 support_ngo_W3@b14
support_com_W3@b15 /*
935     */ african@b16 coloured@b17 educ1@b18 educ3@b19 educ4@b20
Alpha@1 E2@1) /*
936     */ (ds_W5 <- ds_W3@b1 nkids6W5@b2 nkids7to17W5@b3
childcare_capW5@b4 /*live_spouseW5@b5*/ /*
937     */ employMar@b6 empl_mainincomeW5@b7 grant_mainincomeW5@b8 /*
938     */ foodsecurityW52@b9 food_secureW5@b10 /*
939     */ atriskW51@b12 atriskW53@b13 support_ngo_W5@b14
support_com_W5@b15 /*
940     */ african@b16 coloured@b17 educ1@b18 educ3@b19 educ4@b20
Alpha@1) /*
941     */ if female == 0 & continuous_cohabitate==0 &
sometimes_cohabitate==0 [pw=w5_nc_bp_pweight_s], /*
942     */ var(e.ds_W3@0) var(Alpha) cov(Alpha*(african coloured educ1
educ3 educ4)@0 Alpha*(E2)@0 _0Ex*(E2)@0) iterate(250) technique(nr
25 bhhh 25) noxconditional method(mlmv)
943
944 predict y1 y2 if female == 0 & continuous_cohabitate==0 &
sometimes_cohabitate==0 & w5_nc_bp_pweight_s!=.
945 drop y1
946 ren y2 temp
947

```

```

948 predict y1 if female == 0 & never_married==1 & w5_nc_bp_pweight_s
    !=., lat(Alpha)
949 gen predict_men_single_excl_fe = temp-y1
950 drop y1 temp
951
952 qui reg predict_women_single i.foodsecurityW52 i.food_secureW5
953 margins i.food_secureW5#i.foodsecurityW52
954 matrix table = r(table)
955 matrix women_single = [table[1,1] , table[5,1] , table[6,1] \ table
    [1,2] , table[5,2] , table[6,2] \ table[1,3] , table[5,3] , table[6
    ,3]]
956 matrix rownames women_single = "Full" "Marginal" "Low/Very low"
957
958 qui reg predict_women_marr i.foodsecurityW52 i.food_secureW5
959 margins i.food_secureW5#i.foodsecurityW52
960 matrix table = r(table)
961 matrix women_marr = [table[1,1] , table[5,1] , table[6,1] \ table[1
    ,2] , table[5,2] , table[6,2] \ table[1,3] , table[5,3] , table[6,3
    ]]
962 matrix rownames women_marr = "Full" "Marginal" "Low/Very low"
963
964 qui reg predict_men_single i.foodsecurityW52 i.food_secureW5
965 margins i.food_secureW5#i.foodsecurityW52
966 matrix table = r(table)
967 matrix men_single = [table[1,1] , table[5,1] , table[6,1] \ table[1
    ,2] , table[5,2] , table[6,2] \ table[1,3] , table[5,3] , table[6,3
    ]]
968 matrix rownames men_single = "Full" "Marginal" "Low/Very low"
969
970 qui reg predict_men_marr i.foodsecurityW52 i.food_secureW5
971 margins i.food_secureW5#i.foodsecurityW52
972 matrix table = r(table)
973 matrix men_marr = [table[1,1] , table[5,1] , table[6,1] \ table[1,2
    ] , table[5,2] , table[6,2] \ table[1,3] , table[5,3] , table[6,3]]
974 matrix rownames men_marr = "Full" "Marginal" "Low/Very low"
975
976 **Figure 5A
977 coefplot (matrix(women_single[,1]), ci((2 3)) /*
978     */label("Single women")) /*
979     */(matrix(women_marr[,1]), ci((2 3)) /*
980     */label("Married/coupled women")), /*
981     */ciopts(recast(rcap)) recast(connected) citop vertical
nooffset /*
982     */ylabel(1.0(.4)2.6, angle(0) format(%12.2f) labsize(small))
xlabel(,labsize(small)) /*
983     */legend(size(small)) /*
984     */saving(Fig5A.gph, replace)
985

```

```

986 **Figure 5B
987 coefplot (matrix(men_single[,1]), ci((2 3)) /*
988     */label("Single men")) /*
989     */(matrix(men_marr[,1]), ci((2 3)) /*
990     */label("Married/coupled men")), /*
991     */ciopts(recast(rcap)) recast(connected) citop vertical
nooffset /*
992     */ylabel(1.0(.4)2.6, angle(0) format(%12.2f) labsize(small))
xlabel(,labsize(small)) /*
993     */legend(size(small)) /*
994     */saving(Fig5B.gph, replace)
995
996 graph combine Fig5A.gph Fig5B.gph, rows(1)
997
998 coefplot (matrix(women_single[,1]), ci((2 3)) /*
999     */label("Single women")) /*
1000     */(matrix(women_marr[,1]), ci((2 3)) /*
1001     */label("Married/coupled women")) /*
1002     */(matrix(men_single[,1]), ci((2 3)) /*
1003     */label("Single men")) /*
1004     */(matrix(men_marr[,1]), ci((2 3)) /*
1005     */label("Married/coupled men")), /*
1006     */ciopts(recast(rcap)) recast(connected) citop vertical
nooffset /*
1007     */saving(marriage_noFE.gph, replace)
1008
1009 qui reg predict_women_single_excl_fe i.foodsecurityW52 i.
food_secureW5
1010 margins i.food_secureW5#i.foodsecurityW52
1011 matrix table = r(table)
1012 matrix women_single_excl_fe = [table[1,1] , table[5,1] , table[6,1]
\ table[1,2] , table[5,2] , table[6,2] \ table[1,3] , table[5,3] ,
table[6,3]]
1013 matrix rownames women_single_excl_fe = "Full" "Marginal" "Low/Very
low"
1014
1015 qui reg predict_women_marr_excl_fe i.foodsecurityW52 i.food_secureW5
1016 margins i.food_secureW5#i.foodsecurityW52
1017 matrix table = r(table)
1018 matrix women_marr_excl_fe = [table[1,1] , table[5,1] , table[6,1]
\ table[1,2] , table[5,2] , table[6,2] \ table[1,3] , table[5,3] ,
table[6,3]]
1019 matrix rownames women_marr_excl_fe = "Full" "Marginal" "Low/Very
low"
1020
1021 qui reg predict_men_single_excl_fe i.foodsecurityW52 i.food_secureW5
1022 margins i.food_secureW5#i.foodsecurityW52
1023 matrix table = r(table)

```

```

1024 matrix men_single_excl_fe = [table[1,1] , table[5,1] , table[6,1]
\ table[1,2] , table[5,2] , table[6,2] \ table[1,3] , table[5,3] ,
table[6,3]]
1025 matrix rownames men_single_excl_fe = "Full" "Marginal" "Low/Very
low"
1026
1027 qui reg predict_men_marr_excl_fe i.foodsecurityW52 i.food_secureW5
1028 margins i.food_secureW5#i.foodsecurityW52
1029 matrix table = r(table)
1030 matrix men_marr_excl_fe = [table[1,1] , table[5,1] , table[6,1] \
table[1,2] , table[5,2] , table[6,2] \ table[1,3] , table[5,3] ,
table[6,3]]
1031 matrix rownames men_marr_excl_fe = "Full" "Marginal" "Low/Very low"
1032
1033 **Figure 5C
1034 coefplot (matrix(women_single_excl_fe[,1]), ci((2 3)) /*
1035     */label("Single women")) /*
1036     */(matrix(women_marr_excl_fe[,1]), ci((2 3)) /*
1037     */label("Married/coupled women")), /*
1038     */ylabel(1.0(.4)2.6, angle(0) format(%12.2f) labsize(small))
xlabel(,labsize(small)) /*
1039     */legend(size(small)) /*
1040     */ciopts(recast(rcap)) recast(connected) citop vertical
nooffset /*
1041     */saving(Fig5C.gph, replace)
1042
1043 **Figure 5D
1044 coefplot (matrix(men_single_excl_fe[,1]), ci((2 3)) /*
1045     */label("Single men")) /*
1046     */(matrix(men_marr_excl_fe[,1]), ci((2 3)) /*
1047     */label("Married/coupled men")), /*
1048     */ylabel(1.0(.4)2.6, angle(0) format(%12.2f) labsize(small))
xlabel(,labsize(small)) /*
1049     */legend(size(small)) /*
1050     */ciopts(recast(rcap)) recast(connected) citop vertical
nooffset /*
1051     */saving(Fig5D.gph, replace)
1052
1053 graph combine Fig5C.gph Fig5D.gph, rows(1)
1054
1055 graph combine Fig5A.gph Fig5B.gph Fig5C.gph Fig5D.gph, rows(2)
xsize(16) ysize(12)
1056
1057 coefplot (matrix(women_single_excl_fe[,1]), ci((2 3)) /*
1058     */label("Single women")) /*
1059     */(matrix(women_marr_excl_fe[,1]), ci((2 3)) /*
1060     */label("Married/coupled women")) /*
1061     */(matrix(men_othermarr_excl_fe[,1]), ci((2 3)) /*

```

```
1062     */label("Single men")) /*
1063     */(matrix(men_marr_excl_fe[,1]), ci((2 3)) /*
1064     */label("Married/coupled men")), /*
1065     */ciopts(recast(rcap)) recast(connected) citop vertical
nooffset /*
1066     */saving(marriage_FE.gph, replace)
1067
1068 graph combine marriage_noFE.gph marriage_FE.gph, rows(1)
1069
1070 *****
1071 ** Table A2
1072 esttab MLSEMdyn_women_childless MLSEMfe_women_childless
MLSEMdyn_mothers MLSEMfe_mothers MLSEMdyn_women_marr
MLSEMfe_women_marr MLSEMdyn_women_single MLSEMfe_women_single using
TableA2.txt, se wide starlevels(+ 0.10 * 0.05 ** 0.01 *** 0.001)
stats(N)
1073
1074 ** Table A3
1075 esttab MLSEMdyn_men_childless MLSEMfe_men_childless
MLSEMdyn_fathers MLSEMfe_fathers MLSEMdyn_men_marr MLSEMfe_men_marr
MLSEMdyn_men_single MLSEMfe_men_single using TableA3.txt, se wide
starlevels(+ 0.10 * 0.05 ** 0.01 *** 0.001) stats(N)
1076 *****
1077
1078
```
